# Supplementary material for: Unusual molecular complexes of antimony fluoride dimers with acetonitrile and pyridine: structures and bonding
Source: Royal Society of Chemistry journal article supplement (doi:10.1039/d1dt02412d), 2021-01-01
Supplement: d1dt02412d1.pdf [file d1dt02412d1.pdf]

### Supplementary information

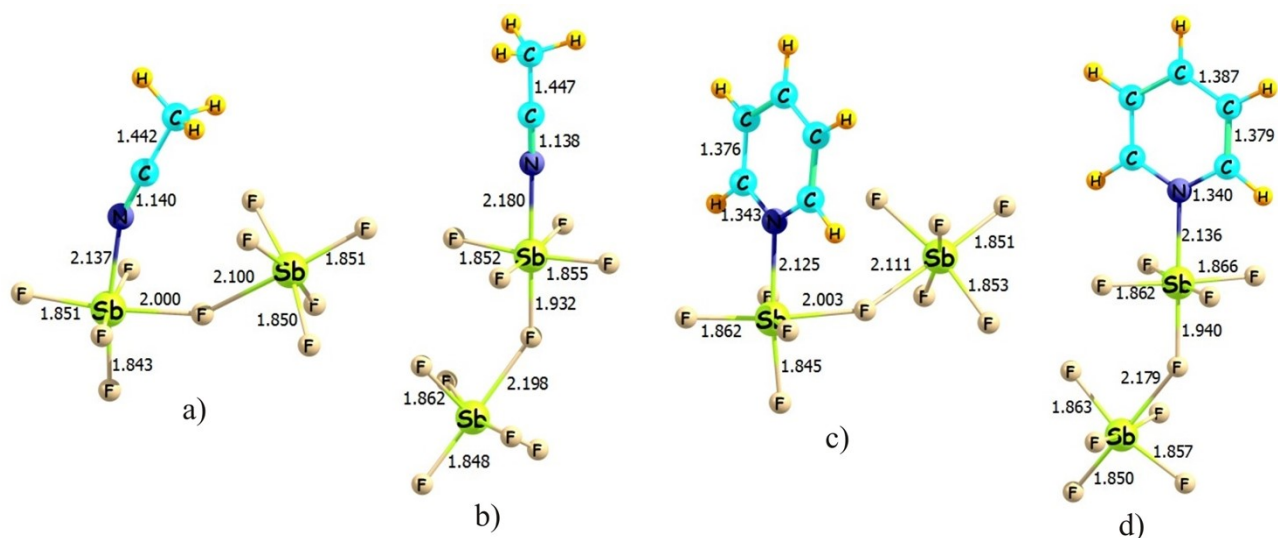

**Figure 1S.** Optimized structures of DA complexes of  $\text{Sb}_2\text{F}_{10}$  dimer with acetonitrile and pyridine: a)  $\text{Sb}_2\text{F}_{10}\cdot\text{AN}$  (isom1); b)  $\text{Sb}_2\text{F}_{10}\cdot\text{AN}$  (isom2); c)  $\text{Sb}_2\text{F}_{10}\cdot\text{Py}$  (isom1); d)  $\text{Sb}_2\text{F}_{10}\cdot\text{Py}$  (isom2). M06-2X/def2-TZVP level of theory.

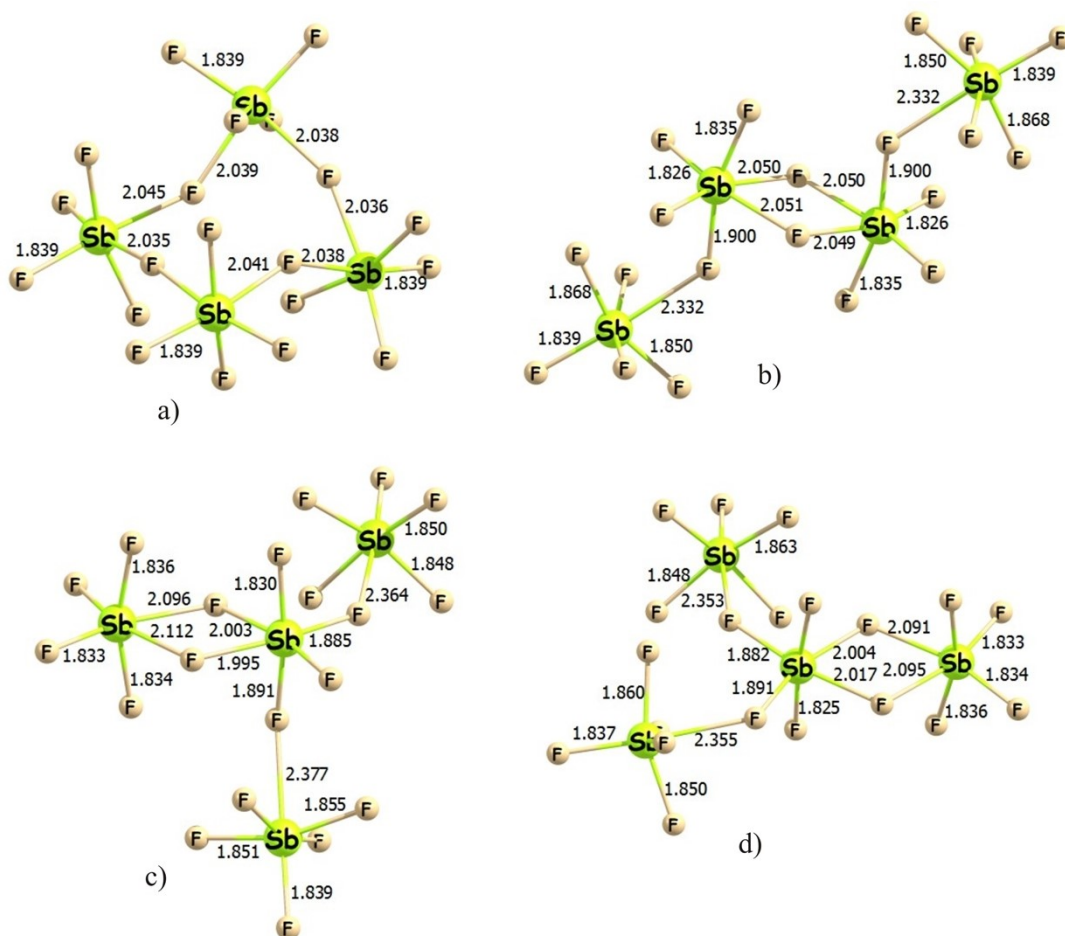

**Figure 2S.** Optimized structures of  $\text{Sb}_4\text{F}_{20}$  tetramers: a)  $\text{Sb}_4\text{F}_{20}$  (isom1); b)  $\text{Sb}_4\text{F}_{20}$  (isom2); c)  $\text{Sb}_4\text{F}_{20}$  (isom3); d)  $\text{Sb}_4\text{F}_{20}$  (isom4). M06-2X/def2-TZVP level of theory.

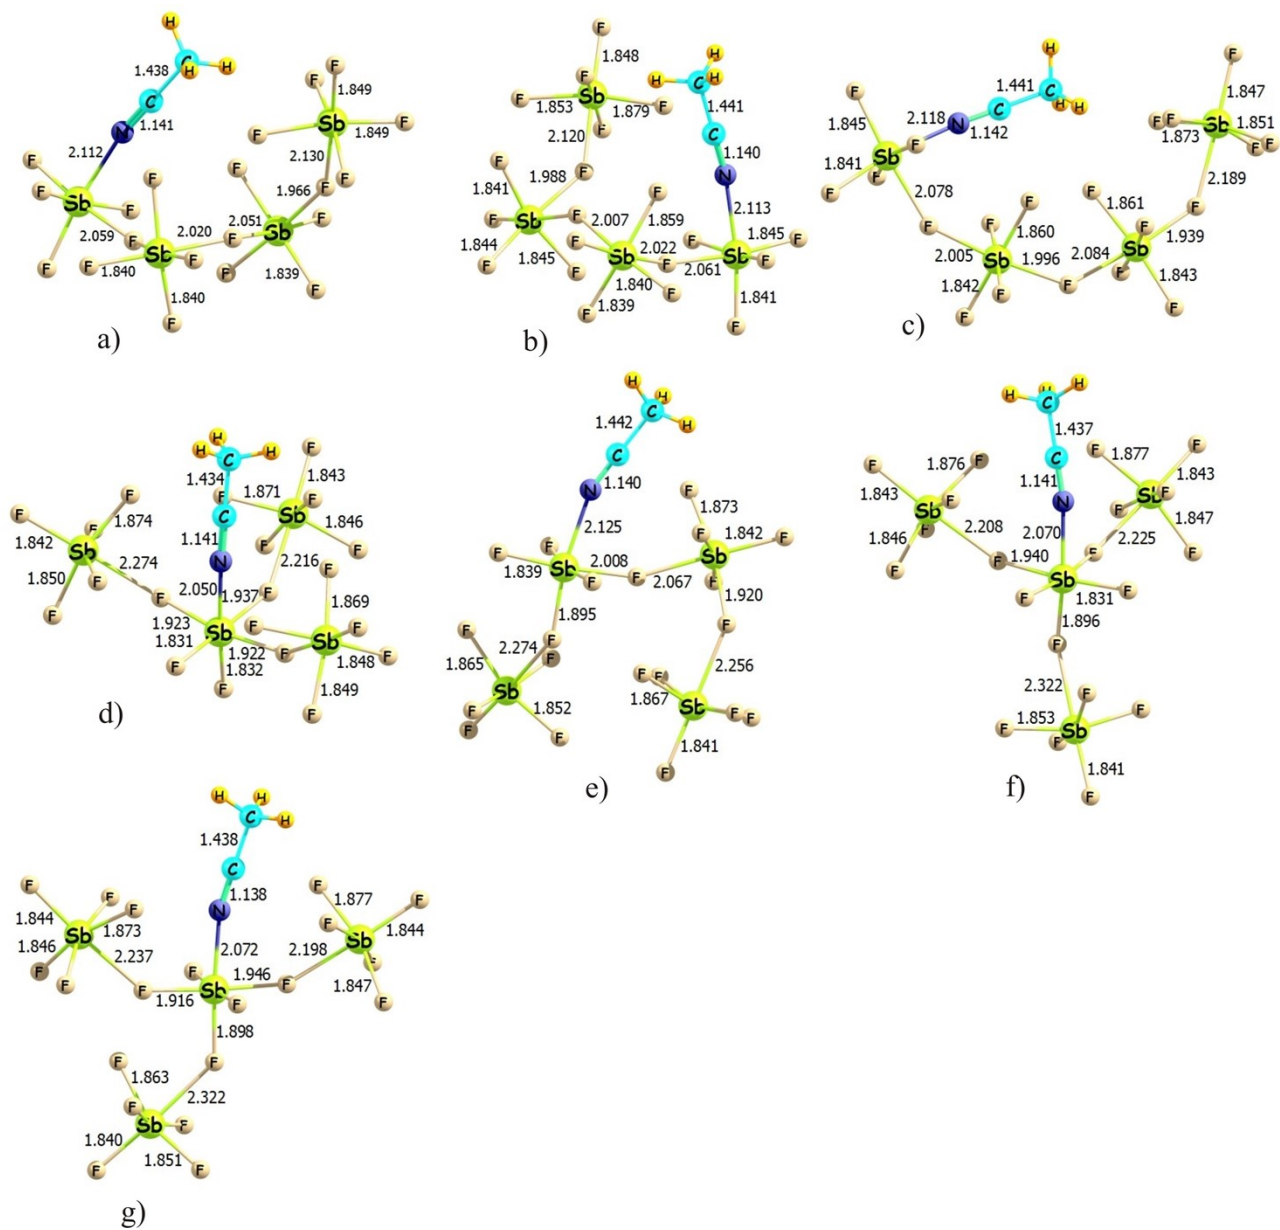

**Figure 3S.** Optimized structures of DA complexes of  $\text{Sb}_4\text{F}_{20}$  tetramers with acetonitrile: a)  $\text{Sb}_4\text{F}_{20}\cdot\text{AN}$  (isom1); b)  $\text{Sb}_4\text{F}_{20}\cdot\text{AN}$  (isom2); c)  $\text{Sb}_4\text{F}_{20}\cdot\text{AN}$  (isom3); d)  $\text{Sb}_4\text{F}_{20}\cdot\text{AN}$  (isom4); e)  $\text{Sb}_4\text{F}_{20}\cdot\text{AN}$  (isom5); f)  $\text{Sb}_4\text{F}_{20}\cdot\text{AN}$  (isom6); g)  $\text{Sb}_4\text{F}_{20}\cdot\text{AN}$  (isom7). M06-2X/def2-TZVP level of theory.

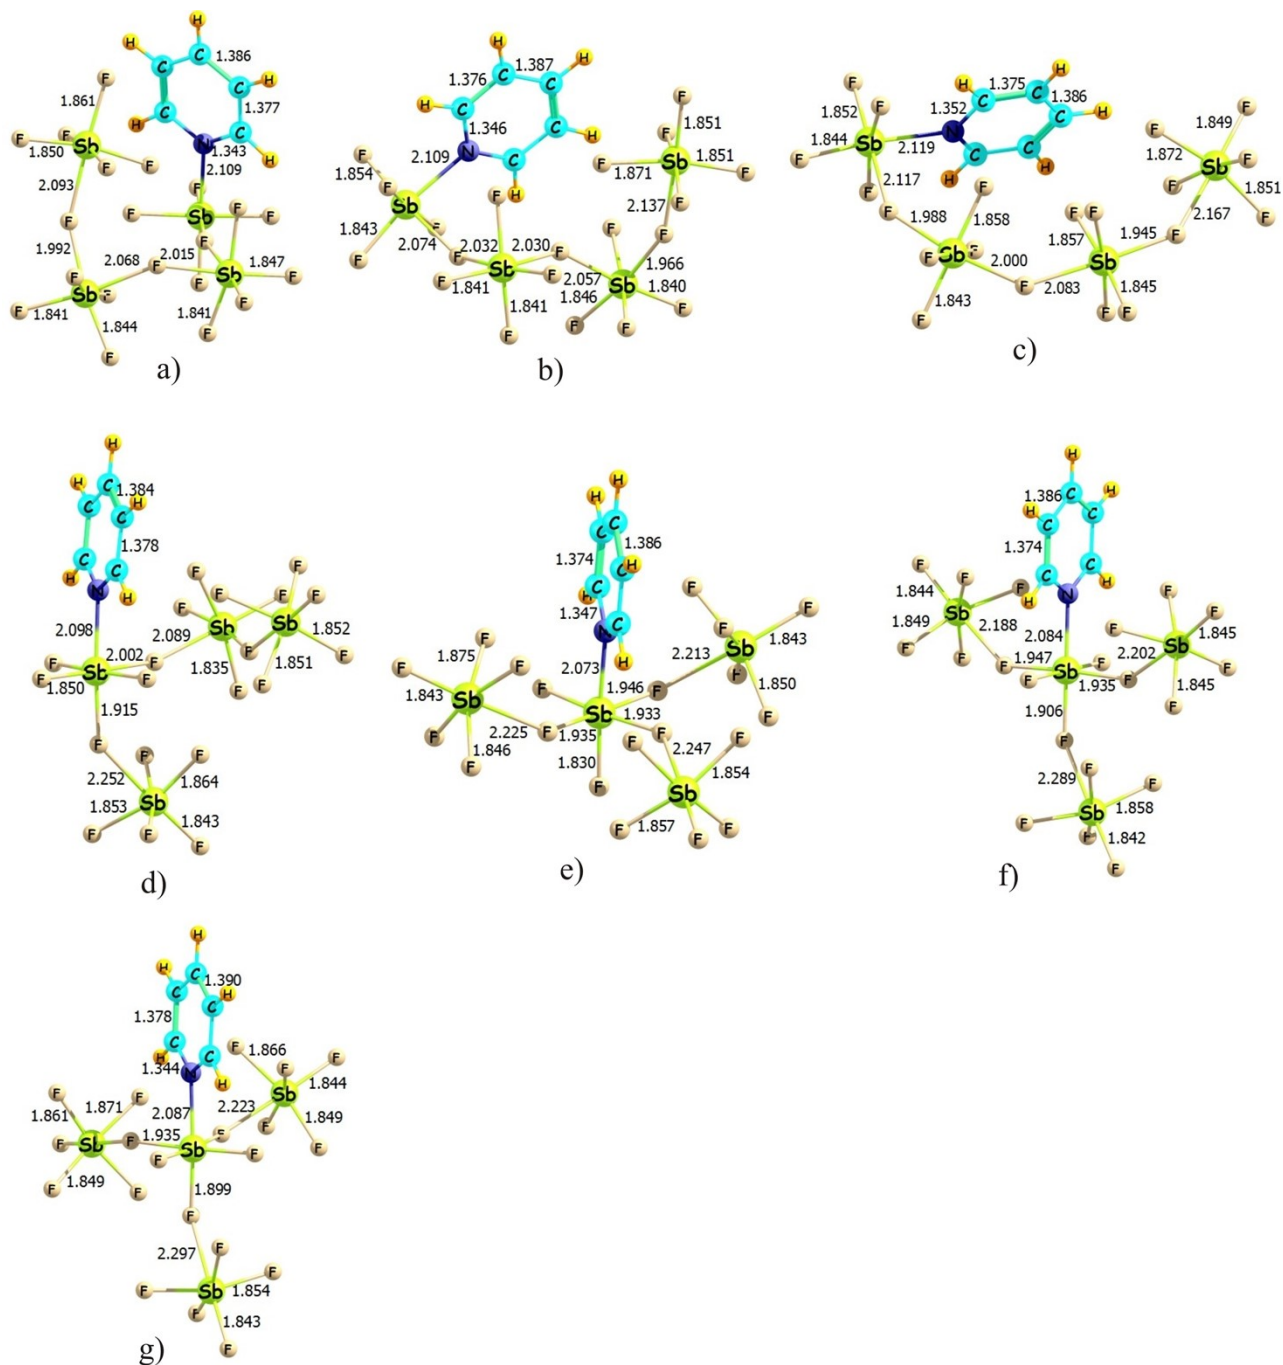

**Figure 4S.** Optimized structures of DA complexes of  $\text{Sb}_4\text{F}_{20}$  tetramers with pyridine: a)  $\text{Sb}_4\text{F}_{20}\cdot\text{Py}$  (isom1); b)  $\text{Sb}_4\text{F}_{20}\cdot\text{Py}$  (isom2); c)  $\text{Sb}_4\text{F}_{20}\cdot\text{Py}$  (isom3); d)  $\text{Sb}_4\text{F}_{20}\cdot\text{Py}$  (isom4); e)  $\text{Sb}_4\text{F}_{20}\cdot\text{Py}$  (isom5); f)  $\text{Sb}_4\text{F}_{20}\cdot\text{Py}$  (isom6); g)  $\text{Sb}_4\text{F}_{20}\cdot\text{Py}$  (isom7). M06-2X/def2-TZVP level of theory.

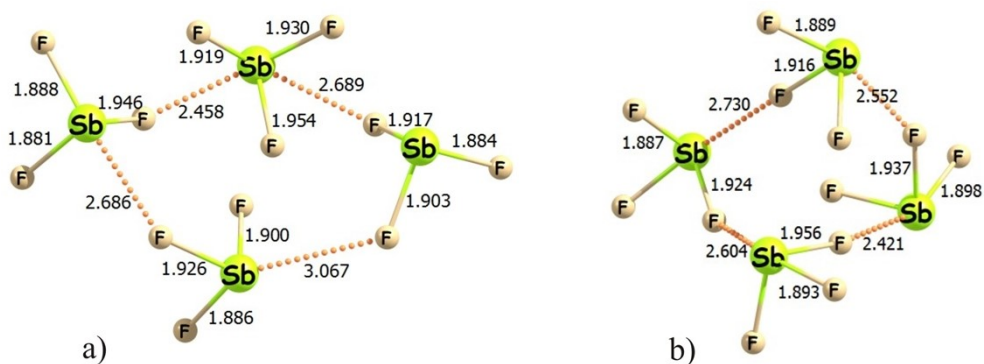

**Figure 5S.** Optimized structures of  $\text{Sb}_4\text{F}_{12}$  tetramers: a)  $\text{Sb}_4\text{F}_{12}$  (isom1); b)  $\text{Sb}_4\text{F}_{12}$  (isom2). M06-2X/def2-TZVP level of theory.

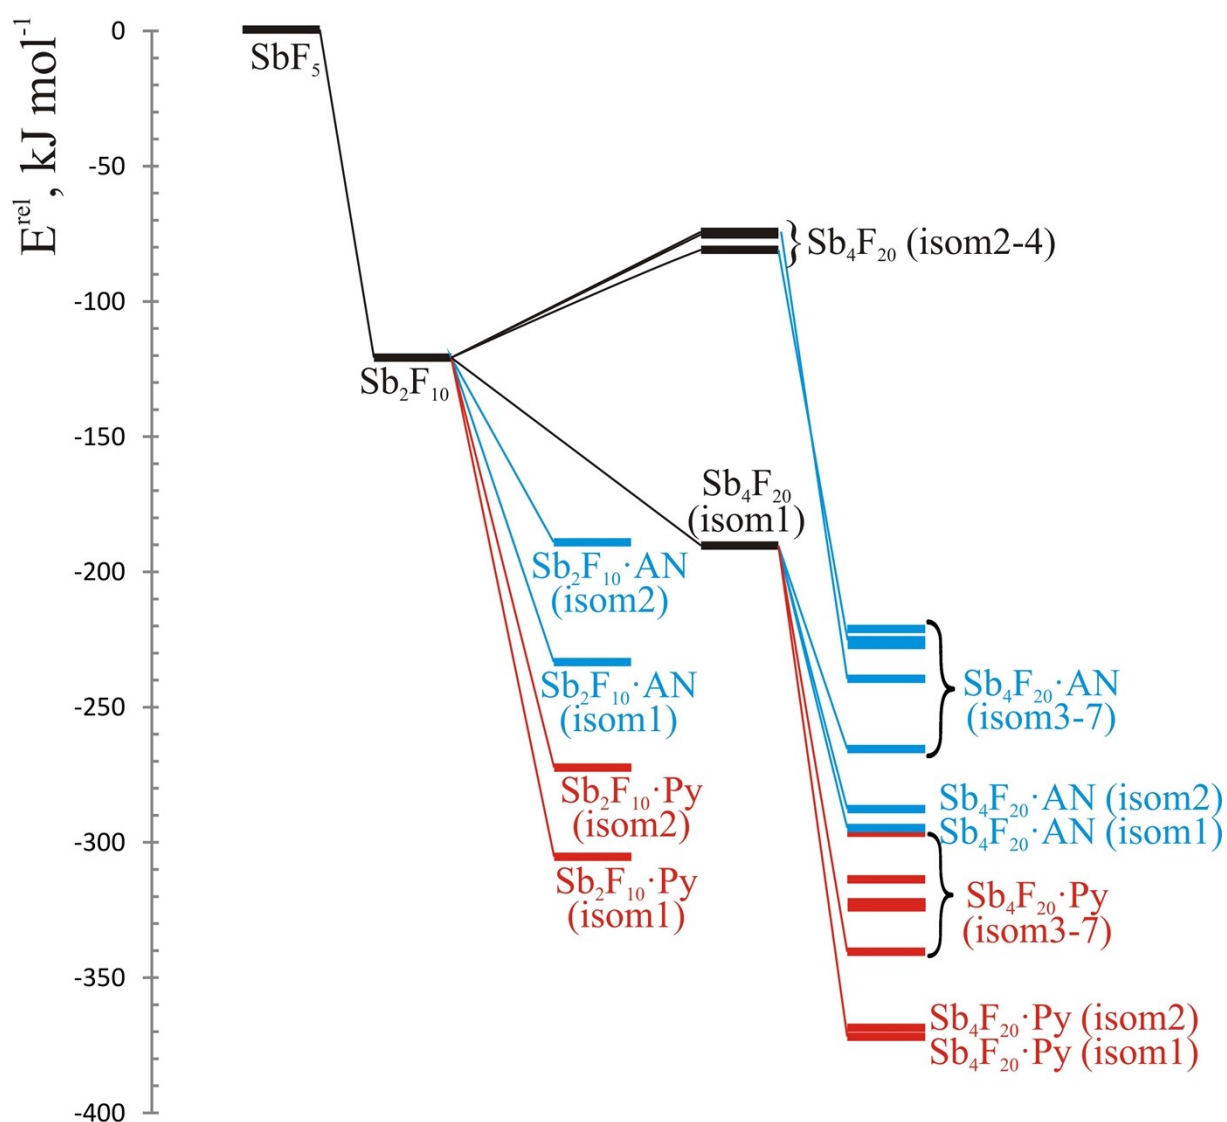

**Figure 6S.** Energy profile for the formation of DA complexes of  $\text{SbF}_5$  monomer, dimer and tetramers with acetonitrile and pyridine. M06-2X/def2-TZVP level of theory.



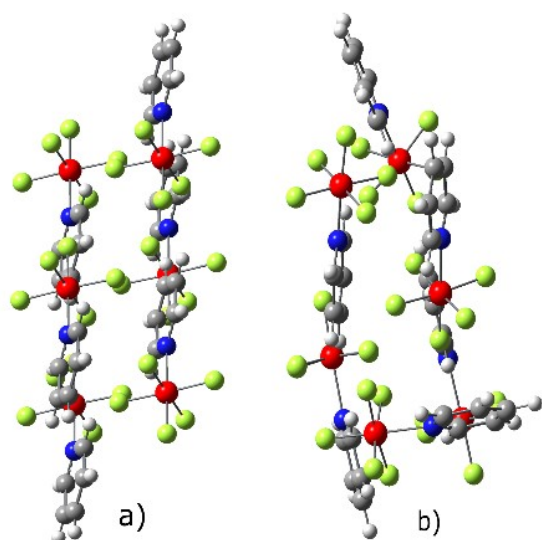

**Figure 7S.** Experimental solid state (a) and gas phase optimized (b) structures of the hexamer

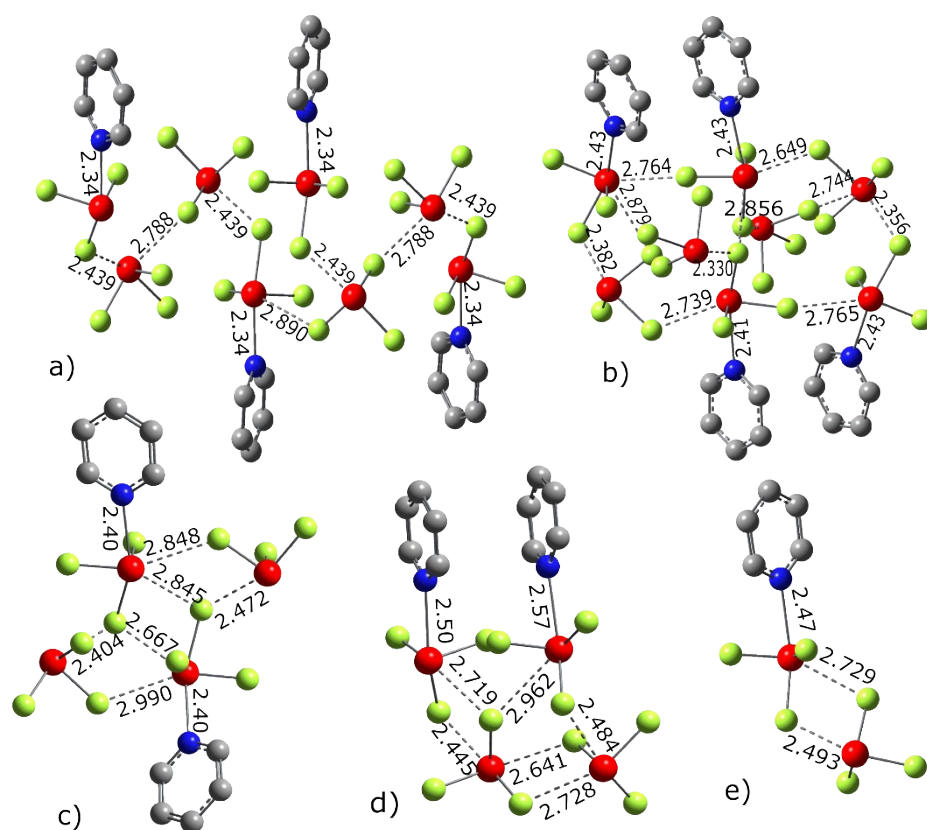

cluster of  $SbF_5 \cdot Py$  ( $2_6$ ). M06-2X/def2-TZVP level of theory.

**Figure 8S.** Experimental solid state (a) and gas phase optimized (b-e) structures of **3**: tetramer  $3_4$  (b), dimer  $3_{2a}$  with  $\pi$ -stacking of Py rings (c) dimer  $3_{2b}$  without  $\pi$ -stacking of Py rings (d) and monomer  $Sb_2F_6 \cdot Py$  (e). Sb-N and Sb  $\cdots$  F interatomic distances shorter than 2.9 Å are shown. Hydrogen atoms are omitted for clarity. M06-2X/def2-TZVP level of theory.

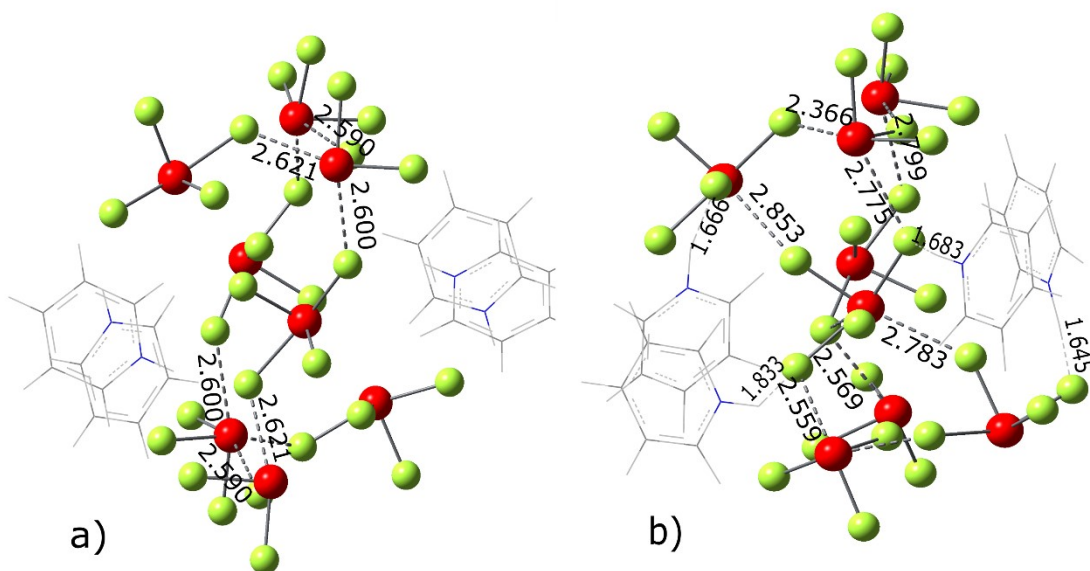

**Figure 9S.** Experimental solid state (a) and gas phase optimized (b) structures of 4: Sb ... F interatomic distances shorter than 2.9 Å are shown. Anionic substructure is highlighted. M06-2X/def2-TZVP level of theory.

**Table 1S.** Total energies  $E^{\circ}_0$ , standard enthalpies  $H^{\circ}_{298}$  (in Hartree) and standard entropies  $S^{\circ}_{298}$  (in cal mol<sup>-1</sup> K<sup>-1</sup>). M06-2X/def2-TZVP level of theory.

| Compound                                    | $E^{\circ}_0$ | $H^{\circ}_{298}$ | $S^{\circ}_{298}$ |
|---------------------------------------------|---------------|-------------------|-------------------|
| AN                                          | -132.746899   | -132.696630       | 57.875            |
| Py                                          | -248.265658   | -248.170955       | 68.548            |
| SbF <sub>5</sub>                            | -739.545963   | -739.526055       | 82.028            |
| SbF <sub>5</sub> ·AN                        | -872.338906   | -872.266575       | 110.433           |
| SbF <sub>5</sub> ·Py                        | -987.886973   | -987.769444       | 110.521           |
| Sb <sub>2</sub> F <sub>10</sub>             | -1479.137814  | -1479.096053      | 119.866           |
| Sb <sub>2</sub> F <sub>10</sub> ·AN (isom1) | -1611.927776  | -1611.833803      | 149.420           |
| Sb <sub>2</sub> F <sub>10</sub> ·AN (isom2) | -1611.910947  | -1611.816882      | 157.902           |
| Sb <sub>2</sub> F <sub>10</sub> ·Py (isom1) | -1727.474014  | -1727.334699      | 152.640           |
| Sb <sub>2</sub> F <sub>10</sub> ·Py (isom2) | -1727.461423  | -1727.322135      | 159.187           |
| Sb <sub>4</sub> F <sub>20</sub> (isom1)     | -2958.302333  | -2958.217187      | 211.454           |
| Sb <sub>4</sub> F <sub>20</sub> (isom2)     | -2958.260792  | -2958.175484      | 215.976           |
| Sb <sub>4</sub> F <sub>20</sub> (isom3)     | -2958.258388  | -2958.173098      | 219.532           |
| Sb <sub>4</sub> F <sub>20</sub> (isom4)     | -2958.258146  | -2958.172856      | 219.233           |
| Sb <sub>4</sub> F <sub>20</sub> ·AN (isom1) | -3091.089015  | -3090.951518      | 232.123           |
| Sb <sub>4</sub> F <sub>20</sub> ·AN (isom2) | -3091.086293  | -3090.948769      | 236.616           |
| Sb <sub>4</sub> F <sub>20</sub> ·AN (isom3) | -3091.077816  | -3090.940393      | 234.270           |
| Sb <sub>4</sub> F <sub>20</sub> ·AN (isom4) | -3091.067976  | -3090.930678      | 240.300           |
| Sb <sub>4</sub> F <sub>20</sub> ·AN (isom5) | -3091.063293  | -3090.925819      | 238.951           |
| Sb <sub>4</sub> F <sub>20</sub> ·AN (isom6) | -3091.062583  | -3090.925137      | 239.092           |
| Sb <sub>4</sub> F <sub>20</sub> ·AN (isom7) | -3091.060990  | -3090.923539      | 244.160           |
| Sb <sub>4</sub> F <sub>20</sub> ·Py (isom1) | -3206.636998  | -3206.454191      | 235.526           |
| Sb <sub>4</sub> F <sub>20</sub> ·Py (isom2) | -3206.635876  | -3206.452902      | 236.907           |
| Sb <sub>4</sub> F <sub>20</sub> ·Py (isom3) | -3206.625180  | -3206.442204      | 238.475           |
| Sb <sub>4</sub> F <sub>20</sub> ·Py (isom4) | -3206.618891  | -3206.435970      | 241.629           |
| Sb <sub>4</sub> F <sub>20</sub> ·Py (isom5) | -3206.618173  | -3206.435282      | 240.824           |
| Sb <sub>4</sub> F <sub>20</sub> ·Py (isom6) | -3206.614996  | -3206.431975      | 243.466           |
| Sb <sub>4</sub> F <sub>20</sub> ·Py (isom7) | -3206.608290  | -3206.425423      | 245.942           |
| SbF <sub>3</sub>                            | -539.847456   | -539.835627       | 72.107            |
| SbF <sub>3</sub> ·AN                        | -672.611465   | -672.547506       | 103.069           |
| SbF <sub>3</sub> ·Py                        | -788.138362   | -788.029448       | 106.985           |
| Sb <sub>2</sub> F <sub>6</sub>              | -1079.718087  | -1079.692618      | 115.433           |
| Sb <sub>2</sub> F <sub>6</sub> ·AN          | -1212.483853  | -1212.406241      | 139.993           |
| Sb <sub>2</sub> F <sub>6</sub> ·Py          | -1328.012648  | -1327.890107      | 143.195           |
| Sb <sub>4</sub> F <sub>12</sub> (isom1)     | -2159.463730  | -2159.411144      | 179.114           |
| Sb <sub>4</sub> F <sub>12</sub> (isom2)     | -2159.462445  | -2159.409971      | 181.664           |
| Sb <sub>4</sub> F <sub>12</sub> ·AN         | -2292.229937  | -2292.125228      | 205.964           |
| Sb <sub>4</sub> F <sub>12</sub> ·Py         | -2407.763293  | -2407.613601      | 207.909           |

|                       |               |              |         |
|-----------------------|---------------|--------------|---------|
| <b>2<sub>6</sub></b>  | -5927.4376714 | -5926.722447 | 451.100 |
| <b>3</b>              | -1328.0128488 | -1327.890312 | 143.984 |
| <b>3<sub>2a</sub></b> | -2656.0661571 | -2655.819287 | 230.845 |
| <b>3<sub>2b</sub></b> | -2656.0594326 | -2655.812556 | 240.487 |
| <b>3<sub>4</sub></b>  | -5312.1606565 | -5311.665100 | 405.416 |
| <b>4<sub>4</sub></b>  | -5714.092899  | -5713.530607 | 441.263 |
| HF                    | -100.4511623  | -100.438353  | 41.477  |

**Table 2S.** Thermodynamic data for the processes of gas-phase dissociation of DA complexes of SbF<sub>5</sub> monomer, dimer and tetramers with acetonitrile and pyridine. M06-2X/def2-TZVP level of theory.

| Process                                                                                    | $\Delta_{\text{diss}}H^{\circ}_{298}$ ,<br>kJ mol <sup>-1</sup> | $\Delta_{\text{diss}}S^{\circ}_{298}$ ,<br>J mol <sup>-1</sup> K <sup>-1</sup> | $\Delta_{\text{diss}}G^{\circ}_{298}$ ,<br>kJ mol <sup>-1</sup> |
|--------------------------------------------------------------------------------------------|-----------------------------------------------------------------|--------------------------------------------------------------------------------|-----------------------------------------------------------------|
| SbF <sub>5</sub> ·AN = SbF <sub>5</sub> + AN                                               | 115.2                                                           | 123.3                                                                          | 78.5                                                            |
| Sb <sub>2</sub> F <sub>10</sub> ·AN (isom1) = Sb <sub>2</sub> F <sub>10</sub> + AN         | 108.0                                                           | 118.5                                                                          | 72.6                                                            |
| Sb <sub>2</sub> F <sub>10</sub> ·AN (isom2) = Sb <sub>2</sub> F <sub>10</sub> + AN         | 63.5                                                            | 83.0                                                                           | 38.8                                                            |
| Sb <sub>4</sub> F <sub>20</sub> ·AN (isom1) = Sb <sub>4</sub> F <sub>20</sub> (isom1) + AN | 99.0                                                            | 155.7                                                                          | 52.6                                                            |
| Sb <sub>4</sub> F <sub>20</sub> ·AN (isom2) = Sb <sub>4</sub> F <sub>20</sub> (isom1) + AN | 91.8                                                            | 136.9                                                                          | 51.0                                                            |
| Sb <sub>4</sub> F <sub>20</sub> ·AN (isom3) = Sb <sub>4</sub> F <sub>20</sub> (isom1) + AN | 69.8                                                            | 146.7                                                                          | 26.1                                                            |
| Sb <sub>4</sub> F <sub>20</sub> ·AN (isom4) = Sb <sub>4</sub> F <sub>20</sub> (isom3) + AN | 160.0                                                           | 155.3                                                                          | 113.8                                                           |
| Sb <sub>4</sub> F <sub>20</sub> ·AN (isom5) = Sb <sub>4</sub> F <sub>20</sub> (isom2) + AN | 141.0                                                           | 146.0                                                                          | 97.5                                                            |
| Sb <sub>4</sub> F <sub>20</sub> ·AN (isom6) = Sb <sub>4</sub> F <sub>20</sub> (isom3) + AN | 145.5                                                           | 160.3                                                                          | 97.7                                                            |
| Sb <sub>4</sub> F <sub>20</sub> ·AN (isom7) = Sb <sub>4</sub> F <sub>20</sub> (isom4) + AN | 141.9                                                           | 137.9                                                                          | 100.8                                                           |
| SbF <sub>5</sub> ·Py = SbF <sub>5</sub> + Py                                               | 190.2                                                           | 167.6                                                                          | 140.2                                                           |
| Sb <sub>2</sub> F <sub>10</sub> ·Py (isom1) = Sb <sub>2</sub> F <sub>10</sub> + Py         | 177.7                                                           | 149.7                                                                          | 133.1                                                           |
| Sb <sub>2</sub> F <sub>10</sub> ·Py (isom2) = Sb <sub>2</sub> F <sub>10</sub> + Py         | 144.7                                                           | 122.3                                                                          | 108.3                                                           |
| Sb <sub>4</sub> F <sub>20</sub> ·Py (isom1) = Sb <sub>4</sub> F <sub>20</sub> (isom1) + Py | 173.4                                                           | 186.1                                                                          | 118.0                                                           |
| Sb <sub>4</sub> F <sub>20</sub> ·Py (isom2) = Sb <sub>4</sub> F <sub>20</sub> (isom1) + Py | 170.0                                                           | 180.3                                                                          | 116.3                                                           |
| Sb <sub>4</sub> F <sub>20</sub> ·Py (isom3) = Sb <sub>4</sub> F <sub>20</sub> (isom1) + Py | 141.9                                                           | 173.7                                                                          | 90.2                                                            |
| Sb <sub>4</sub> F <sub>20</sub> ·Py (isom4) = Sb <sub>4</sub> F <sub>20</sub> (isom2) + Py | 235.1                                                           | 179.5                                                                          | 181.6                                                           |
| Sb <sub>4</sub> F <sub>20</sub> ·Py (isom5) = Sb <sub>4</sub> F <sub>20</sub> (isom3) + Py | 239.5                                                           | 197.7                                                                          | 180.6                                                           |
| Sb <sub>4</sub> F <sub>20</sub> ·Py (isom6) = Sb <sub>4</sub> F <sub>20</sub> (isom4) + Py | 231.5                                                           | 185.4                                                                          | 176.2                                                           |
| Sb <sub>4</sub> F <sub>20</sub> ·Py (isom7) = Sb <sub>4</sub> F <sub>20</sub> (isom3) + Py | 213.6                                                           | 176.3                                                                          | 161.1                                                           |



**Table 3S.** XYZ coordinates of optimized structures.

|                                     |                 |                 |                                                |    |                 |                 |                 |
|-------------------------------------|-----------------|-----------------|------------------------------------------------|----|-----------------|-----------------|-----------------|
| <b>SbF<sub>5</sub></b>              |                 |                 | <b>Sb<sub>2</sub>F<sub>10</sub>·AN (isom1)</b> |    |                 |                 |                 |
| Sb                                  | 0.000000000000  | 0.000000000000  | 0.000000000000                                 | Sb | 2.010240000000  | -0.241111000000 | -0.001750000000 |
| F                                   | 0.000000000000  | 1.842380000000  | 0.000000000000                                 | Sb | -1.956139000000 | -0.311437000000 | -0.001349000000 |
| F                                   | 0.000000000000  | 0.000000000000  | 1.853186000000                                 | F  | 0.087814000000  | -0.770546000000 | -0.152467000000 |
| F                                   | 0.000000000000  | 0.000000000000  | -1.853186000000                                | F  | 1.947850000000  | -0.068692000000 | -1.842551000000 |
| F                                   | -1.595548000000 | -0.921190000000 | 0.000000000000                                 | F  | 3.705026000000  | 0.488750000000  | 0.137449000000  |
| F                                   | 1.595548000000  | -0.921190000000 | 0.000000000000                                 | F  | 1.699981000000  | -0.189379000000 | 1.820410000000  |
| <b>SbF<sub>5</sub>·AN</b>           |                 |                 | <b>Sb<sub>2</sub>F<sub>10</sub>·AN (isom2)</b> |    |                 |                 |                 |
| Sb                                  | 0.000102000000  | -0.000014000000 | -0.600855000000                                | Sb | 1.466699000000  | 0.280125000000  | -0.000076000000 |
| F                                   | 1.837811000000  | -0.242588000000 | -0.394919000000                                | F  | 1.887205000000  | 1.535321000000  | 1.300013000000  |
| F                                   | 0.000984000000  | 0.000216000000  | -2.452638000000                                | F  | 1.886611000000  | 1.529468000000  | -1.305992000000 |
| F                                   | 0.242493000000  | 1.837778000000  | -0.395453000000                                | F  | 1.262986000000  | -1.006385000000 | -1.316516000000 |
| F                                   | -0.242477000000 | -1.837845000000 | -0.396175000000                                | F  | 1.262866000000  | -1.000501000000 | 1.322028000000  |
| F                                   | -1.837803000000 | 0.242381000000  | -0.396628000000                                | F  | -0.398880000000 | 0.781479000000  | -0.000377000000 |
| N                                   | -0.000753000000 | -0.000056000000 | 1.626977000000                                 | Sb | -2.395546000000 | -0.137160000000 | 0.000012000000  |
| C                                   | -0.000728000000 | -0.000068000000 | 2.764507000000                                 | F  | -2.173608000000 | -0.043715000000 | -1.842162000000 |
| C                                   | -0.000537000000 | 0.000198000000  | 4.213594000000                                 | F  | -1.352710000000 | -1.680279000000 | 0.002969000000  |
| H                                   | 0.094886000000  | 1.024777000000  | 4.569239000000                                 | F  | -2.958417000000 | 1.631059000000  | -0.003036000000 |
| H                                   | 0.839098000000  | -0.594533000000 | 4.569493000000                                 | F  | -2.175831000000 | -0.038043000000 | 1.842141000000  |
| H                                   | -0.935413000000 | -0.429373000000 | 4.569733000000                                 | F  | -4.056939000000 | -0.946802000000 | 0.000265000000  |
| <b>SbF<sub>5</sub>·Py</b>           |                 |                 | <b>Sb<sub>2</sub>F<sub>10</sub>·AN (isom2)</b> |    |                 |                 |                 |
| Sb                                  | 0.994419000000  | 0.102282000000  | 0.000333000000                                 | N  | 3.580535000000  | -0.253009000000 | 0.000654000000  |
| F                                   | 0.962636000000  | -1.094760000000 | -1.445388000000                                | C  | 4.674676000000  | -0.565723000000 | 0.000615000000  |
| F                                   | 2.838781000000  | 0.293543000000  | 0.003622000000                                 | C  | 6.065597000000  | -0.965099000000 | 0.000183000000  |
| F                                   | 0.987135000000  | -1.368993000000 | 1.166356000000                                 | H  | 6.652765000000  | -0.204201000000 | -0.512084000000 |
| F                                   | 0.689592000000  | 1.539343000000  | -1.168609000000                                | H  | 6.404869000000  | -1.066890000000 | 1.030102000000  |
| F                                   | 0.713671000000  | 1.269462000000  | 1.443596000000                                 | H  | 6.158614000000  | -1.918591000000 | -0.518084000000 |
| N                                   | -1.164261000000 | -0.120049000000 | -0.001334000000                                |    |                 |                 |                 |
| C                                   | -1.939187000000 | 0.963505000000  | 0.118386000000                                 |    |                 |                 |                 |
| H                                   | -1.424468000000 | 1.910376000000  | 0.209669000000                                 |    |                 |                 |                 |
| C                                   | -3.315215000000 | 0.856480000000  | 0.123007000000                                 |    |                 |                 |                 |
| H                                   | -3.919123000000 | 1.746530000000  | 0.221091000000                                 |    |                 |                 |                 |
| C                                   | -3.887965000000 | -0.400384000000 | 0.000906000000                                 |    |                 |                 |                 |
| H                                   | -4.964426000000 | -0.511258000000 | 0.002090000000                                 |    |                 |                 |                 |
| C                                   | -3.071359000000 | -1.514197000000 | -0.122686000000                                |    |                 |                 |                 |
| H                                   | -3.481568000000 | -2.508564000000 | -0.219866000000                                |    |                 |                 |                 |
| C                                   | -1.702375000000 | -1.338687000000 | -0.120331000000                                |    |                 |                 |                 |
| H                                   | -1.005649000000 | -2.160796000000 | -0.212512000000                                |    |                 |                 |                 |
| <b>Sb<sub>2</sub>F<sub>10</sub></b> |                 |                 |                                                |    |                 |                 |                 |
| Sb                                  | -1.676324000000 | 0.000000000000  | 0.000000000000                                 |    |                 |                 |                 |
| Sb                                  | 1.676324000000  | 0.000000000000  | 0.000000000000                                 |    |                 |                 |                 |
| F                                   | 0.000000000000  | 0.000000000000  | 1.190898000000                                 |    |                 |                 |                 |
| F                                   | -1.459525000000 | 1.828098000000  | 0.000000000000                                 |    |                 |                 |                 |
| F                                   | -2.813789000000 | 0.000000000000  | -1.445354000000                                |    |                 |                 |                 |
| F                                   | 0.000000000000  | 0.000000000000  | -1.190898000000                                |    |                 |                 |                 |
| F                                   | -1.459525000000 | -1.828098000000 | 0.000000000000                                 |    |                 |                 |                 |
| F                                   | 1.459525000000  | 1.828098000000  | 0.000000000000                                 |    |                 |                 |                 |
| F                                   | 2.813789000000  | 0.000000000000  | 1.445354000000                                 |    |                 |                 |                 |
| F                                   | 1.459525000000  | -1.828098000000 | 0.000000000000                                 |    |                 |                 |                 |
| F                                   | 2.813789000000  | 0.000000000000  | -1.445354000000                                |    |                 |                 |                 |
| F                                   | -2.813789000000 | 0.000000000000  | 1.445354000000                                 |    |                 |                 |                 |

**Sb<sub>2</sub>F<sub>10</sub>·Py (isom1)**

Sb 1.748299000000 -0.854318000000 -0.038224000000  
Sb -2.138473000000 -0.194589000000 0.051132000000  
F -0.220484000000 -0.956541000000 -0.393673000000  
F 1.927722000000 -0.747472000000 -1.891654000000  
F 3.555331000000 -0.562255000000 0.301016000000  
F 1.305002000000 -0.773561000000 1.769617000000  
F 1.814341000000 -2.697864000000 -0.050790000000  
F -1.807331000000 0.838050000000 -1.476734000000  
F -2.737457000000 -1.576805000000 -1.027732000000  
F -2.068545000000 -1.324309000000 1.518568000000  
F -1.155590000000 1.084718000000 1.009350000000  
F -3.793636000000 0.549519000000 0.413893000000  
N 1.442066000000 1.247553000000 -0.082868000000  
C 0.872746000000 1.826510000000 -1.150020000000  
H 0.650851000000 1.187121000000 -1.991816000000  
C 0.570997000000 3.171807000000 -1.146857000000  
H 0.093011000000 3.605886000000 -2.012323000000  
C 0.872458000000 3.923816000000 -0.024007000000  
H 0.636994000000 4.979537000000 0.004430000000  
C 1.471644000000 3.312951000000 1.068730000000  
H 1.718116000000 3.866077000000 1.962803000000  
C 1.737938000000 1.964351000000 1.013910000000  
H 2.176251000000 1.424823000000 1.841381000000

**Sb<sub>2</sub>F<sub>10</sub>·Py (isom2)**

Sb 1.060158000000 0.343119000000 0.001900000000  
F 1.401093000000 1.636152000000 1.302955000000  
F 1.397816000000 1.635075000000 -1.301087000000  
F 0.834716000000 -0.951553000000 -1.316955000000  
F 0.837664000000 -0.950494000000 1.322362000000  
F -0.828281000000 0.787860000000 0.004482000000  
N 3.144040000000 -0.125307000000 -0.000422000000  
C 4.049196000000 0.862747000000 -0.003788000000  
H 3.659388000000 1.872187000000 -0.005094000000  
C 5.399368000000 0.582813000000 -0.005507000000  
H 6.111693000000 1.394591000000 -0.008260000000  
C 5.807576000000 -0.743010000000 -0.003664000000  
H 6.861697000000 -0.987473000000 -0.004958000000  
C 4.857742000000 -1.753824000000 -0.000166000000  
H 5.139882000000 -2.796316000000 0.001364000000  
C 3.522087000000 -1.411240000000 0.001380000000  
H 2.727918000000 -2.146432000000 0.004107000000  
Sb -2.793389000000 -0.154336000000 -0.000974000000  
F -2.574976000000 -0.060931000000 -1.844197000000  
F -1.749448000000 -1.697312000000 0.003473000000  
F -3.385995000000 1.605039000000 -0.004177000000  
F -2.587515000000 -0.058435000000 1.843535000000  
F -4.448396000000 -0.980099000000 -0.006054000000

**Sb<sub>4</sub>F<sub>20</sub> (isom1)**

Sb -1.964546000000 -1.737075000000 -0.699988000000  
F 0.016937000000 -1.853041000000 -0.251127000000  
Sb 1.815828000000 -1.873896000000 0.700858000000  
F 1.587822000000 0.150406000000 0.524460000000  
Sb 1.921385000000 1.734882000000 -0.715394000000  
F 0.070593000000 2.282956000000 -0.059939000000  
Sb -1.771341000000 1.887531000000 0.711775000000  
F -1.565219000000 0.253885000000 -0.489950000000  
F 3.566826000000 1.030017000000 -1.137884000000  
F 1.948650000000 3.245179000000 -1.764248000000  
F 2.475281000000 2.563753000000 0.829407000000  
F 0.952483000000 0.707961000000 -1.902049000000  
F 1.759126000000 -3.712357000000 0.714510000000  
F 2.471689000000 -1.727313000000 -1.013399000000  
F 3.436332000000 -1.588855000000 1.524308000000  
F 0.801893000000 -1.647046000000 2.215578000000  
F -0.799748000000 0.874707000000 1.905719000000  
F -2.363729000000 2.690171000000 -0.832608000000  
F -1.686813000000 3.439904000000 1.693897000000  
F -3.418974000000 1.253384000000 1.230239000000  
F -1.346840000000 -1.469743000000 -2.409336000000  
F -2.174758000000 -1.663865000000 1.128132000000  
F -2.022466000000 -3.572318000000 -0.808824000000  
F -3.716602000000 -1.322624000000 -1.081305000000

**Sb<sub>4</sub>F<sub>20</sub> (isom2)**

Sb 1.081172000000 -1.284225000000 0.000077000000  
Sb -1.082084000000 1.284480000000 -0.000093000000  
F 0.000443000000 -0.000230000000 1.176012000000  
F -0.424775000000 -2.332934000000 0.000264000000  
F 1.844335000000 -2.040109000000 -1.477134000000  
F -0.000470000000 0.000282000000 -1.176042000000  
F 2.281561000000 0.188643000000 -0.000862000000  
F -2.281036000000 -0.189428000000 0.000419000000  
F -1.844764000000 2.039350000000 1.477805000000  
F 0.424002000000 2.332930000000 0.000124000000  
F -1.845876000000 2.039693000000 -1.477244000000  
F 1.846083000000 -2.040332000000 1.476231000000  
Sb -4.611006000000 -0.288503000000 0.000026000000  
F -4.312696000000 -0.268971000000 -1.829154000000  
F -4.284486000000 -2.109299000000 -0.000617000000  
F -4.313736000000 -0.270243000000 1.829365000000  
F -4.229791000000 1.540578000000 0.000720000000  
F -6.449168000000 -0.247089000000 -0.000334000000  
Sb 4.611468000000 0.288430000000 0.000017000000  
F 4.232269000000 -1.540849000000 -0.000645000000  
F 4.314876000000 0.269842000000 -1.829425000000  
F 4.282261000000 2.108831000000 0.000385000000  
F 4.313798000000 0.268871000000 1.829351000000  
F 6.449719000000 0.249439000000 0.000621000000

**Sb<sub>4</sub>F<sub>20</sub> (isom4)**

Sb 0.187288000000 -0.573373000000 0.134277000000  
 Sb 3.407818000000 -1.451669000000 -0.058748000000  
 F 1.435065000000 -2.153545000000 0.012949000000  
 F 0.381438000000 -0.669971000000 1.949453000000  
 F -0.671160000000 1.095624000000 0.277132000000  
 F 0.182498000000 -0.545598000000 -1.690149000000  
 F -1.270326000000 -1.775933000000 0.193565000000  
 F 2.058560000000 0.140747000000 0.071292000000  
 F 3.232388000000 -1.455993000000 1.769707000000  
 F 4.097665000000 -3.148179000000 -0.160696000000  
 F 3.050752000000 -1.312717000000 -1.854745000000  
 F 4.873946000000 -0.351712000000 -0.086938000000  
 Sb 0.047793000000 3.316105000000 -0.025372000000  
 F -1.136657000000 3.643443000000 1.354609000000  
 F -1.360447000000 3.368314000000 -1.220470000000  
 F 0.759505000000 4.992213000000 -0.280175000000  
 F 1.020930000000 2.353377000000 -1.292768000000  
 F 1.256156000000 2.657297000000 1.229552000000  
 Sb -3.573503000000 -1.346445000000 -0.046311000000  
 F -3.733475000000 -2.733978000000 1.165604000000  
 F -3.410831000000 -2.592465000000 -1.404068000000  
 F -5.331864000000 -0.856434000000 -0.252057000000  
 F -2.744029000000 -0.105990000000 -1.165564000000  
 F -3.083359000000 -0.234666000000 1.361971000000

**Sb<sub>4</sub>F<sub>20</sub> (isom3)**

Sb -0.120403000000 0.069140000000 -1.147850000000  
 Sb 0.714645000000 2.918547000000 0.398244000000  
 F -0.632279000000 1.313878000000 0.335707000000  
 F -1.165288000000 1.084788000000 -2.255049000000  
 F 0.703224000000 -0.863502000000 -2.482997000000  
 F 0.897196000000 -0.758063000000 0.214165000000  
 F -1.508718000000 -1.141446000000 -0.747699000000  
 F 1.227495000000 1.540206000000 -1.118036000000  
 F -0.381129000000 3.584940000000 -0.915836000000  
 F -0.149314000000 3.747112000000 1.785734000000  
 F 1.677891000000 1.761658000000 1.445062000000  
 F 2.128150000000 4.016106000000 0.000763000000  
 Sb -3.564855000000 -1.022938000000 0.412585000000  
 F -3.312982000000 0.717730000000 -0.205644000000  
 F -2.346618000000 -0.610907000000 1.754844000000  
 F -5.139556000000 -0.808776000000 1.336311000000  
 F -3.221248000000 -2.814474000000 0.710895000000  
 F -4.219853000000 -1.457464000000 -1.262258000000  
 Sb 2.981299000000 -1.896692000000 0.316889000000  
 F 3.374198000000 -0.577285000000 1.554103000000  
 F 3.222659000000 -0.614985000000 -1.016370000000  
 F 4.607440000000 -2.753072000000 0.267223000000  
 F 2.074480000000 -2.921068000000 -0.936508000000  
 F 2.103696000000 -2.831040000000 1.649676000000

**Sb<sub>4</sub>F<sub>20</sub>·AN (isom2)**

Sb 1.248423000000 -1.974458000000 0.867060000000  
 F 1.663493000000 -0.080026000000 0.428644000000  
 Sb 3.233693000000 1.123085000000 -0.332483000000  
 F 1.849535000000 2.366266000000 -0.597046000000  
 Sb -2.333921000000 1.999065000000 0.815153000000  
 F -2.068579000000 0.006619000000 0.361088000000  
 Sb -2.204143000000 -1.573116000000 -0.893227000000  
 F -0.225475000000 -1.623113000000 -0.563867000000  
 F -2.461579000000 3.826526000000 1.031671000000  
 F -3.359419000000 1.469210000000 2.249524000000  
 F -0.726951000000 1.797344000000 1.695758000000  
 F -3.724540000000 1.857202000000 -0.396507000000  
 F 4.271972000000 -0.369174000000 0.025215000000  
 F 2.687615000000 0.371393000000 -1.959042000000  
 F 4.556753000000 2.185400000000 -1.065540000000  
 F 3.395292000000 1.704418000000 1.416016000000  
 F -2.330955000000 -2.574267000000 0.644363000000  
 F -1.730952000000 -0.317868000000 -2.180878000000  
 F -4.010208000000 -1.261174000000 -1.060740000000  
 F -2.043397000000 -3.001691000000 -2.042181000000  
 F 2.241491000000 -2.388551000000 -0.626675000000  
 F -0.012767000000 -1.239156000000 1.994718000000  
 F 2.612318000000 -2.055582000000 2.096275000000  
 F 0.575021000000 -3.683066000000 1.035329000000  
 N -1.141254000000 2.260458000000 -0.908760000000  
 C -0.491102000000 2.229606000000 -1.844426000000  
 C 0.306937000000 2.180346000000 -3.042720000000  
 H 0.945072000000 1.296391000000 -2.988788000000  
 H -0.357460000000 2.128574000000 -3.904318000000  
 H 0.931509000000 3.072345000000 -3.079460000000

**Sb<sub>4</sub>F<sub>20</sub>·AN (isom1)**

|    |                 |                 |                 |
|----|-----------------|-----------------|-----------------|
| F  | 3.942647000000  | 1.587136000000  | -0.076853000000 |
| Sb | 3.677012000000  | -0.050806000000 | -0.898402000000 |
| F  | 3.128099000000  | -1.768996000000 | -1.399719000000 |
| F  | 5.135130000000  | -0.777026000000 | -0.022549000000 |
| F  | 1.970884000000  | 0.523183000000  | -1.428880000000 |
| F  | 4.505730000000  | 0.341737000000  | -2.503868000000 |
| F  | 2.641201000000  | -0.518008000000 | 0.902836000000  |
| Sb | 0.919661000000  | -0.841481000000 | 1.794634000000  |
| F  | -0.794382000000 | -0.888154000000 | 2.475860000000  |
| F  | 1.558503000000  | 0.265145000000  | 3.117782000000  |
| F  | 0.385962000000  | -1.574164000000 | 0.167488000000  |
| F  | 1.545262000000  | -2.424500000000 | 2.493002000000  |
| F  | 0.381893000000  | 0.901129000000  | 0.856362000000  |
| Sb | -1.093873000000 | 2.079958000000  | 0.140023000000  |
| F  | -2.593979000000 | 2.952774000000  | -0.472484000000 |
| F  | -1.476742000000 | 2.334033000000  | 1.921322000000  |
| F  | -0.696145000000 | 1.307809000000  | -1.496844000000 |
| F  | -2.180485000000 | 0.373214000000  | 0.357432000000  |
| F  | 0.128098000000  | 3.443811000000  | -0.015926000000 |
| Sb | -3.523360000000 | -0.914828000000 | -0.524376000000 |
| F  | -4.572990000000 | -2.115945000000 | -1.452687000000 |
| F  | -4.784155000000 | -0.301555000000 | 0.669611000000  |
| F  | -2.806026000000 | -2.152337000000 | 0.640710000000  |
| F  | -3.767458000000 | 0.487621000000  | -1.705107000000 |
| N  | -1.867185000000 | -1.380345000000 | -1.749468000000 |
| C  | -0.866632000000 | -1.439382000000 | -2.293700000000 |
| C  | 0.392646000000  | -1.507606000000 | -2.985598000000 |
| H  | 0.260681000000  | -2.059808000000 | -3.915355000000 |
| H  | 1.121174000000  | -1.997584000000 | -2.337028000000 |
| H  | 0.721521000000  | -0.485401000000 | -3.178800000000 |

**Sb<sub>4</sub>F<sub>20</sub>·AN (isom3)**

|    |                 |                 |                 |
|----|-----------------|-----------------|-----------------|
| F  | -2.849885000000 | 1.513953000000  | -1.134673000000 |
| Sb | -4.363558000000 | 1.365339000000  | -0.041473000000 |
| F  | -5.661207000000 | 0.767697000000  | 1.134042000000  |
| F  | -5.287310000000 | 0.632438000000  | -1.467981000000 |
| F  | -3.220163000000 | 1.687030000000  | 1.397610000000  |
| F  | -4.942122000000 | 3.108899000000  | -0.235339000000 |
| Sb | -1.905246000000 | -1.587727000000 | 0.089679000000  |
| Sb | 1.844349000000  | -1.587156000000 | -0.084903000000 |
| F  | -1.665482000000 | -1.207511000000 | -1.700539000000 |
| F  | -1.941859000000 | -2.040741000000 | 1.877762000000  |
| F  | -2.598887000000 | -3.239096000000 | -0.346193000000 |
| F  | -1.024343000000 | -0.009506000000 | 0.534228000000  |
| F  | 2.557475000000  | -2.893297000000 | 1.000363000000  |
| F  | 1.131318000000  | -0.264706000000 | -1.181301000000 |
| F  | 0.019178000000  | -2.385866000000 | 0.032884000000  |
| F  | 2.268865000000  | -2.582222000000 | -1.575579000000 |
| F  | -3.617716000000 | -0.682258000000 | 0.165488000000  |
| F  | 1.485843000000  | -0.543774000000 | 1.405168000000  |
| F  | 3.577566000000  | -0.585135000000 | -0.194119000000 |
| Sb | 4.403187000000  | 1.309521000000  | 0.024991000000  |
| F  | 4.991396000000  | 3.046994000000  | 0.220295000000  |
| F  | 6.041548000000  | 0.481466000000  | -0.117928000000 |
| F  | 4.131411000000  | 1.391354000000  | -1.799130000000 |
| F  | 4.219380000000  | 0.950257000000  | 1.824624000000  |
| N  | 2.397373000000  | 1.981552000000  | 0.138749000000  |
| C  | 1.289301000000  | 2.255176000000  | 0.108597000000  |
| C  | -0.104116000000 | 2.616342000000  | 0.051827000000  |
| H  | -0.589503000000 | 2.334183000000  | 0.986931000000  |
| H  | -0.180007000000 | 3.690443000000  | -0.117052000000 |
| H  | -0.573624000000 | 2.062781000000  | -0.763803000000 |

**Sb<sub>4</sub>F<sub>20</sub>·AN (isom5)**

Sb 0.288405000000 1.978986000000 -0.643808000000  
F 1.610676000000 0.623473000000 -0.575449000000  
Sb 3.554235000000 0.137798000000 0.500218000000  
F 3.024320000000 -1.593576000000 0.109079000000  
Sb -0.425321000000 -2.801905000000 -0.506641000000  
F -2.275979000000 -1.558684000000 -0.159751000000  
Sb -2.864382000000 0.044684000000 0.718305000000  
F -0.953686000000 0.703282000000 0.284493000000  
F 1.086233000000 -3.805518000000 -0.816378000000  
F -1.491670000000 -3.482241000000 -1.860990000000  
F -0.028131000000 -1.344711000000 -1.603321000000  
F -1.263137000000 -3.928749000000 0.703385000000  
F 3.532254000000 2.000945000000 0.573166000000  
F 2.416475000000 0.136823000000 1.965720000000  
F 5.134859000000 -0.190562000000 1.389364000000  
F 4.238028000000 0.279648000000 -1.218031000000  
F -3.221694000000 0.764879000000 -0.962648000000  
F -2.152065000000 -0.564080000000 2.296216000000  
F -4.576670000000 -0.581463000000 0.978046000000  
F -3.139271000000 1.759588000000 1.418465000000  
F 0.622694000000 2.573542000000 1.061615000000  
F -0.419235000000 1.337427000000 -2.212421000000  
F 1.312279000000 3.264888000000 -1.469042000000  
N -1.417871000000 3.245457000000 -0.606820000000  
C -2.497092000000 3.601769000000 -0.514545000000  
C -3.867459000000 4.034437000000 -0.400798000000  
H -3.997215000000 4.974646000000 -0.935252000000  
H -4.494894000000 3.255568000000 -0.836724000000  
H -4.103392000000 4.150762000000 0.656568000000  
F 0.155727000000 -1.756479000000 0.918869000000

**Sb<sub>4</sub>F<sub>20</sub>·AN (isom7)**

Sb 0.271497000000 -0.106478000000 0.014558000000  
Sb 4.196324000000 -0.461964000000 0.030368000000  
F 2.049158000000 -0.866310000000 -0.204840000000  
F 0.575311000000 0.003039000000 1.820328000000  
F -1.422883000000 0.756525000000 0.250739000000  
F 0.064698000000 -0.161903000000 -1.804604000000  
F -0.441796000000 -1.853850000000 0.214976000000  
F 3.542120000000 0.800715000000 1.251630000000  
F 4.062092000000 -1.770500000000 1.326672000000  
F 4.347653000000 -1.727604000000 -1.305266000000  
F 3.825477000000 0.841896000000 -1.268219000000  
F 5.981180000000 -0.045031000000 0.231492000000  
N 1.193082000000 1.737185000000 -0.196915000000  
C 1.924899000000 2.607608000000 -0.251275000000  
C 2.858807000000 3.699055000000 -0.312132000000  
H 3.588861000000 3.552516000000 0.485221000000  
H 2.319118000000 4.635977000000 -0.174974000000  
H 3.353693000000 3.671349000000 -1.282982000000  
Sb -2.362413000000 2.774799000000 0.031294000000  
F -3.252613000000 2.286075000000 1.573858000000  
F -3.595648000000 1.867635000000 -0.999604000000  
F -3.016925000000 4.486657000000 -0.170879000000  
F -1.181840000000 2.782429000000 -1.418838000000  
F -0.872104000000 3.226553000000 1.072232000000  
Sb -2.549231000000 -2.798360000000 -0.026698000000  
F -1.881251000000 -3.997320000000 1.215443000000  
F -1.687011000000 -3.750990000000 -1.361099000000  
F -4.255067000000 -3.455868000000 -0.238023000000  
F -2.613949000000 -1.342916000000 -1.187469000000  
F -2.857784000000 -1.597897000000 1.357687000000

**Sb<sub>4</sub>F<sub>20</sub>·AN (isom6)**

Sb 0.363045000000 -0.042014000000 0.798420000000  
Sb -1.714385000000 3.053898000000 -0.453816000000  
F -0.414748000000 1.247727000000 -0.415311000000  
F 1.074699000000 1.323838000000 1.788939000000  
F 0.894648000000 -1.440121000000 1.857706000000  
F -0.544863000000 -1.310725000000 -0.355259000000  
F 1.804404000000 -0.162255000000 -0.427639000000  
F -1.403401000000 2.928023000000 1.383925000000  
F -0.100179000000 3.929088000000 -0.654511000000  
F -1.772006000000 2.671760000000 -2.259238000000  
F -3.044159000000 1.760662000000 -0.168167000000  
F -2.834775000000 4.516978000000 -0.419830000000  
N -1.451849000000 0.074968000000 1.787368000000  
C -2.579637000000 0.070403000000 1.961916000000  
C -3.997667000000 0.056526000000 2.191937000000  
H -4.236589000000 0.752022000000 2.996117000000  
H -4.289669000000 -0.961277000000 2.452537000000  
H -4.471876000000 0.362200000000 1.258134000000  
Sb 4.116952000000 -0.190602000000 -0.218459000000  
F 3.834173000000 1.641595000000 -0.217638000000  
F 4.041516000000 -0.168717000000 -2.067184000000  
F 5.937800000000 -0.205084000000 0.051076000000  
F 3.810462000000 -2.017975000000 -0.260780000000  
F 3.529505000000 -0.207320000000 1.551952000000  
Sb -2.138630000000 -2.833319000000 -0.482040000000  
F -1.984337000000 -2.498412000000 -2.290643000000  
F -3.212114000000 -1.304431000000 -0.307986000000  
F -3.520269000000 -4.052872000000 -0.528616000000  
F -1.980438000000 -2.740690000000 1.381534000000  
F -0.710493000000 -4.002780000000 -0.530201000000

**Sb<sub>4</sub>F<sub>20</sub>·AN (isom4)**

Sb 0.176693000000 -0.686551000000 -1.118304000000  
Sb 3.805670000000 -0.907778000000 0.335443000000  
F 2.086759000000 -0.484535000000 -1.053954000000  
F 0.281633000000 -2.513600000000 -1.056158000000  
F -1.738004000000 -0.631604000000 -0.952472000000  
F 0.139786000000 1.249042000000 -1.058427000000  
F 0.122211000000 -0.565458000000 -2.945093000000  
F 2.543275000000 -2.139350000000 0.947815000000  
F 4.274262000000 -2.093732000000 -1.004048000000  
F 4.590130000000 0.477139000000 -0.603276000000  
F 2.899413000000 0.352311000000 1.376941000000  
F 5.155237000000 -1.278352000000 1.533428000000  
N 0.164735000000 -0.524788000000 0.924800000000  
C -0.021982000000 -0.105924000000 1.969255000000  
C -0.255651000000 0.427206000000 3.280153000000  
H -0.436067000000 -0.394881000000 3.972244000000  
H -1.138034000000 1.065883000000 3.205986000000  
H 0.621267000000 1.008258000000 3.567453000000  
Sb -0.546287000000 3.094817000000 -0.042328000000  
F 0.876746000000 3.842083000000 -0.950767000000  
F 0.635980000000 2.484616000000 1.277089000000  
F -1.136776000000 4.582967000000 0.870331000000  
F -1.745725000000 1.859200000000 0.689171000000  
F -1.620779000000 3.228994000000 -1.539599000000  
Sb -3.398659000000 -1.550852000000 0.299130000000  
F -1.975886000000 -2.700358000000 0.652787000000  
F -2.704744000000 -0.499913000000 1.687495000000  
F -4.311724000000 -0.072214000000 -0.321710000000  
F -3.711020000000 -2.444703000000 -1.289780000000  
F -4.709976000000 -2.359745000000 1.308365000000



**Sb<sub>4</sub>F<sub>20</sub>·Py (isom1)**

|    |                 |                 |                 |
|----|-----------------|-----------------|-----------------|
| Sb | -2.507812000000 | -1.170303000000 | -0.919574000000 |
| F  | -2.096598000000 | 0.778135000000  | -0.857188000000 |
| Sb | -1.534547000000 | 2.426417000000  | 0.303950000000  |
| F  | -0.055867000000 | 1.336339000000  | 0.690266000000  |
| Sb | 2.743493000000  | -0.196721000000 | -1.212407000000 |
| F  | 1.312912000000  | -0.973146000000 | 0.061222000000  |
| Sb | 0.398890000000  | -2.134845000000 | 1.431154000000  |
| F  | -1.259052000000 | -1.230724000000 | 0.727269000000  |
| F  | 4.028270000000  | 0.637174000000  | -2.259698000000 |
| F  | 2.635458000000  | -1.784396000000 | -2.141951000000 |
| F  | 1.308913000000  | 0.552830000000  | -2.123236000000 |
| F  | 3.940928000000  | -0.921625000000 | 0.018284000000  |
| F  | -3.089368000000 | 3.217290000000  | -0.313521000000 |
| F  | -2.460095000000 | 1.567450000000  | 1.662412000000  |
| F  | -0.931146000000 | 3.847314000000  | 1.344115000000  |
| F  | -0.625246000000 | 2.990506000000  | -1.223690000000 |
| F  | 0.155545000000  | -3.307436000000 | 0.032533000000  |
| F  | 0.568528000000  | -0.652270000000 | 2.521147000000  |
| F  | 2.058859000000  | -2.789159000000 | 1.907157000000  |
| F  | -0.642388000000 | -3.077629000000 | 2.622265000000  |
| F  | -3.800699000000 | -0.778205000000 | 0.329227000000  |
| F  | -0.911542000000 | -1.303184000000 | -1.835513000000 |
| F  | -3.560818000000 | -0.896405000000 | -2.404591000000 |
| F  | -2.720088000000 | -2.994007000000 | -0.746078000000 |
| N  | 2.633438000000  | 1.470636000000  | 0.074211000000  |
| C  | 2.283580000000  | 2.657322000000  | -0.451516000000 |
| H  | 2.153512000000  | 2.699383000000  | -1.523659000000 |
| C  | 2.061653000000  | 3.748276000000  | 0.357455000000  |
| H  | 1.757009000000  | 4.683296000000  | -0.088827000000 |
| C  | 2.186067000000  | 3.602351000000  | 1.730969000000  |
| H  | 1.979547000000  | 4.438315000000  | 2.385789000000  |
| C  | 2.555326000000  | 2.374296000000  | 2.258065000000  |
| H  | 2.654792000000  | 2.219043000000  | 3.322021000000  |
| C  | 2.773323000000  | 1.319041000000  | 1.401342000000  |
| H  | 3.051604000000  | 0.336204000000  | 1.754125000000  |

**Sb<sub>4</sub>F<sub>20</sub>·Py (isom2)**

|    |                 |                 |                 |
|----|-----------------|-----------------|-----------------|
| F  | -3.781119000000 | 0.336115000000  | -1.935290000000 |
| Sb | -3.440837000000 | 1.313502000000  | -0.400513000000 |
| F  | -2.939679000000 | 1.954269000000  | 1.285384000000  |
| F  | -5.106987000000 | 0.879008000000  | 0.278421000000  |
| F  | -1.627983000000 | 1.377486000000  | -0.860873000000 |
| F  | -3.858912000000 | 2.984466000000  | -1.078707000000 |
| F  | -2.865390000000 | -0.576360000000 | 0.413360000000  |
| Sb | -1.571339000000 | -1.837515000000 | 1.189107000000  |
| F  | -0.140249000000 | -2.847826000000 | 1.771460000000  |
| F  | -1.871409000000 | -2.860378000000 | -0.312899000000 |
| F  | -1.153598000000 | -0.453668000000 | 2.353805000000  |
| F  | -2.883196000000 | -2.582327000000 | 2.241769000000  |
| F  | -0.233319000000 | -0.843222000000 | -0.016841000000 |
| Sb | 0.969290000000  | -1.089303000000 | -1.633264000000 |
| F  | 2.298835000000  | -1.268588000000 | -2.894027000000 |
| F  | 1.025207000000  | -2.843195000000 | -1.076735000000 |
| F  | 0.977318000000  | 0.759494000000  | -1.665476000000 |
| F  | 2.373357000000  | -0.811601000000 | -0.191426000000 |
| F  | -0.513772000000 | -1.267872000000 | -2.704066000000 |
| Sb | 3.779714000000  | 0.535484000000  | 0.521543000000  |
| F  | 4.927643000000  | 1.847198000000  | 1.153618000000  |
| F  | 5.035984000000  | -0.779229000000 | 0.218995000000  |
| N  | 2.111128000000  | 1.804762000000  | 0.755348000000  |
| F  | 3.346547000000  | -0.181603000000 | 2.183020000000  |
| F  | 3.857922000000  | 1.110250000000  | -1.248932000000 |
| C  | -0.113939000000 | 3.396830000000  | 0.916028000000  |
| C  | 2.037429000000  | 2.922991000000  | 0.010653000000  |
| C  | 1.107204000000  | 1.467577000000  | 1.587956000000  |
| C  | -0.018758000000 | 2.251248000000  | 1.691286000000  |
| C  | 0.933818000000  | 3.742523000000  | 0.075453000000  |
| H  | 2.869774000000  | 3.124651000000  | -0.648072000000 |
| H  | 1.226824000000  | 0.557520000000  | 2.157739000000  |
| H  | -0.820156000000 | 1.943953000000  | 2.344779000000  |
| H  | 0.896439000000  | 4.626524000000  | -0.543732000000 |
| H  | -1.008337000000 | 4.004709000000  | 0.962038000000  |

**Sb<sub>4</sub>F<sub>20</sub>·Py (isom3)**

|    |                 |                 |                 |
|----|-----------------|-----------------|-----------------|
| F  | -2.877153000000 | 1.527446000000  | -1.141394000000 |
| Sb | -4.394748000000 | 1.245000000000  | -0.082306000000 |
| F  | -5.697800000000 | 0.564078000000  | 1.041960000000  |
| F  | -5.272911000000 | 0.555071000000  | -1.558586000000 |
| F  | -3.290541000000 | 1.542213000000  | 1.395156000000  |
| F  | -5.027331000000 | 2.978930000000  | -0.197487000000 |
| Sb | -1.874410000000 | -1.676717000000 | 0.061097000000  |
| Sb | 1.870432000000  | -1.803479000000 | -0.017319000000 |
| F  | -1.625725000000 | -1.417710000000 | -1.749946000000 |
| F  | -1.941109000000 | -2.009089000000 | 1.876123000000  |
| F  | -2.603200000000 | -3.338708000000 | -0.269304000000 |
| F  | -0.996703000000 | -0.078020000000 | 0.410295000000  |
| F  | 2.545177000000  | -3.066092000000 | 1.143412000000  |
| F  | 1.187459000000  | -0.552092000000 | -1.208810000000 |
| F  | 0.016837000000  | -2.548645000000 | 0.078175000000  |
| F  | 2.335816000000  | -2.879507000000 | -1.439233000000 |
| F  | -3.592170000000 | -0.763751000000 | 0.052870000000  |
| F  | 1.445438000000  | -0.727174000000 | 1.435991000000  |
| F  | 3.555041000000  | -0.751498000000 | -0.107358000000 |
| Sb | 4.208381000000  | 1.261617000000  | -0.074753000000 |
| F  | 4.782040000000  | 3.022343000000  | -0.041822000000 |
| N  | 2.193756000000  | 1.880355000000  | 0.141169000000  |
| F  | 5.878714000000  | 0.503175000000  | -0.266022000000 |
| F  | 3.898871000000  | 1.157982000000  | -1.906172000000 |
| F  | 4.239472000000  | 0.981571000000  | 1.764558000000  |
| C  | -0.405222000000 | 2.739335000000  | 0.425668000000  |
| C  | 1.446002000000  | 2.149053000000  | -0.952124000000 |
| C  | 1.670209000000  | 2.052883000000  | 1.374664000000  |
| C  | 0.375989000000  | 2.484819000000  | 1.542580000000  |
| C  | 0.144153000000  | 2.576016000000  | -0.836525000000 |
| H  | 1.910855000000  | 1.983774000000  | -1.910839000000 |
| H  | 2.307203000000  | 1.813117000000  | 2.210984000000  |
| H  | -0.018284000000 | 2.589641000000  | 2.542461000000  |
| H  | -0.439969000000 | 2.744990000000  | -1.728983000000 |
| H  | -1.437292000000 | 3.041191000000  | 0.538307000000  |

**Sb<sub>4</sub>F<sub>20</sub>·Py (isom4)**

|    |                 |                 |                 |
|----|-----------------|-----------------|-----------------|
| Sb | 1.066216000000  | 1.834363000000  | -0.778925000000 |
| F  | 2.663475000000  | 0.787473000000  | -0.925201000000 |
| Sb | 3.467955000000  | -1.177416000000 | -0.174442000000 |
| F  | 1.650817000000  | -1.566103000000 | -0.318082000000 |
| Sb | -2.865736000000 | -1.657738000000 | -0.994358000000 |
| F  | -1.216049000000 | -1.233288000000 | 0.334265000000  |
| Sb | -0.827718000000 | -0.293146000000 | 2.003101000000  |
| F  | 0.551379000000  | 0.707427000000  | 0.793767000000  |
| F  | -4.306385000000 | -1.970180000000 | -2.111069000000 |
| F  | -2.723492000000 | 0.167797000000  | -1.418045000000 |
| F  | -1.518257000000 | -1.996274000000 | -2.216788000000 |
| F  | -3.838645000000 | -1.147597000000 | 0.508419000000  |
| F  | 5.080175000000  | -0.264614000000 | -0.225759000000 |
| F  | 3.094189000000  | -0.334308000000 | 1.442452000000  |
| F  | 4.059549000000  | -2.791957000000 | 0.488563000000  |
| F  | 3.642919000000  | -1.530123000000 | -1.984727000000 |
| F  | -1.962047000000 | 1.019951000000  | 1.328294000000  |
| F  | 0.517954000000  | -1.509479000000 | 2.279326000000  |
| F  | -2.115558000000 | -1.181653000000 | 2.968054000000  |
| F  | -0.240780000000 | 0.869211000000  | 3.318430000000  |
| F  | 1.921990000000  | 2.901056000000  | 0.472715000000  |
| F  | 0.146738000000  | 0.601294000000  | -1.801515000000 |
| F  | 1.518286000000  | 2.898786000000  | -2.222781000000 |
| N  | -0.714878000000 | 2.883905000000  | -0.423200000000 |
| C  | -0.854655000000 | 3.620596000000  | 0.697841000000  |
| C  | -2.047025000000 | 4.239814000000  | 0.984012000000  |
| C  | -2.956939000000 | 3.323352000000  | -1.036047000000 |
| C  | -3.114688000000 | 4.085009000000  | 0.108997000000  |
| C  | -1.738035000000 | 2.729302000000  | -1.281525000000 |
| H  | -1.567834000000 | 2.101423000000  | -2.143727000000 |
| H  | -3.766511000000 | 3.162633000000  | -1.732240000000 |
| H  | -4.067167000000 | 4.549954000000  | 0.326635000000  |
| H  | -2.136037000000 | 4.819447000000  | 1.890816000000  |
| H  | 0.004630000000  | 3.683656000000  | 1.350149000000  |
| F  | -2.711976000000 | -3.372102000000 | -0.309552000000 |

**Sb<sub>4</sub>F<sub>20</sub>·Py (isom6)**

Sb -0.296227000000 -0.146039000000 -0.123722000000  
Sb -4.162115000000 -0.710640000000 0.009459000000  
F -2.003671000000 -1.053570000000 0.104561000000  
F -0.575259000000 -0.118868000000 -1.949867000000  
F 1.446120000000 0.649637000000 -0.399296000000  
F -0.052449000000 -0.237490000000 1.702332000000  
F 0.492220000000 -1.871219000000 -0.313855000000  
F -3.604671000000 0.366698000000 -1.417209000000  
F -4.140872000000 -2.175958000000 -1.117058000000  
F -4.190155000000 -1.813806000000 1.492916000000  
F -3.682199000000 0.720099000000 1.119865000000  
F -5.960091000000 -0.312977000000 -0.089216000000  
Sb 2.611662000000 2.481991000000 -0.035695000000  
F 3.282808000000 2.136349000000 -1.722635000000  
F 3.851500000000 1.350279000000 0.728789000000  
F 3.462197000000 4.082844000000 0.305359000000  
F 1.585452000000 2.412758000000 1.529109000000  
F 1.093245000000 3.233095000000 -0.842123000000  
Sb 2.531502000000 -2.840275000000 0.065003000000  
F 1.903286000000 -4.040989000000 -1.197532000000  
F 1.571695000000 -3.750663000000 1.363781000000  
F 4.196010000000 -3.560791000000 0.387412000000  
F 2.593520000000 -1.376890000000 1.214750000000  
F 2.987965000000 -1.683197000000 -1.315483000000  
N -1.178000000000 1.732507000000 0.067412000000  
C -1.250326000000 2.312620000000 1.283850000000  
H -0.850879000000 1.756896000000 2.117544000000  
C -1.806865000000 3.560249000000 1.431574000000  
H -1.848620000000 4.001166000000 2.416199000000  
C -2.301368000000 4.216039000000 0.314951000000  
H -2.745358000000 5.197937000000 0.412878000000  
C -2.222959000000 3.607327000000 -0.927879000000  
H -2.595083000000 4.086109000000 -1.821116000000  
C -1.650176000000 2.362379000000 -1.028521000000  
H -1.559631000000 1.843699000000 -1.969960000000

**Sb<sub>4</sub>F<sub>20</sub>·Py (isom7)**

Sb -0.255034000000 -0.334003000000 1.067415000000  
Sb 2.273928000000 -1.920002000000 -1.461305000000  
F 0.815581000000 -0.515831000000 -0.542281000000  
F -0.563361000000 -2.150776000000 1.097560000000  
F -1.176885000000 0.040176000000 2.622258000000  
F 0.191555000000 1.542949000000 0.914043000000  
F -1.725682000000 0.037894000000 -0.075608000000  
F 2.233811000000 -2.577122000000 0.296498000000  
F 0.737584000000 -2.886399000000 -1.814985000000  
F 2.001320000000 -0.877331000000 -2.960130000000  
F 3.497197000000 -0.664426000000 -0.820355000000  
F 3.507374000000 -3.113495000000 -2.135735000000  
Sb -3.917793000000 -0.633989000000 -0.217113000000  
F -3.117954000000 -2.046953000000 -1.112356000000  
F -3.878139000000 0.349892000000 -1.783217000000  
F -5.663231000000 -1.224169000000 -0.251144000000  
F -4.165285000000 0.939464000000 0.732371000000  
F -3.370328000000 -1.427982000000 1.380277000000  
Sb 0.803980000000 3.208446000000 -0.456790000000  
F -0.225377000000 2.214678000000 -1.634277000000  
F 2.204321000000 2.004588000000 -0.758190000000  
F 1.376659000000 4.547346000000 -1.583805000000  
F 1.714708000000 3.710920000000 1.085875000000  
F -0.723536000000 4.016476000000 0.202125000000  
N 1.517462000000 -0.554099000000 2.146801000000  
C 2.632689000000 0.108884000000 1.796242000000  
H 2.568908000000 0.800009000000 0.965507000000  
C 3.815973000000 -0.118780000000 2.465676000000  
H 4.700955000000 0.417816000000 2.157467000000  
C 3.838709000000 -1.039118000000 3.499843000000  
H 4.759763000000 -1.236453000000 4.032341000000  
C 2.675227000000 -1.715011000000 3.847710000000  
H 2.658179000000 -2.442299000000 4.645748000000  
C 1.522328000000 -1.456295000000 3.147445000000  
H 0.588265000000 -1.960656000000 3.356938000000

**Sb<sub>4</sub>F<sub>20</sub>·Py (isom5)**

Sb -0.040592000000 -0.510368000000 -1.042303000000  
 Sb 3.705483000000 -1.086242000000 -0.092668000000  
 F 1.812075000000 -0.079820000000 -0.685615000000  
 F 0.327738000000 -2.121681000000 -1.869986000000  
 F -1.949467000000 -0.854186000000 -1.197549000000  
 F -0.521359000000 1.102002000000 -0.090086000000  
 F -0.041457000000 0.447886000000 -2.601626000000  
 F 2.475594000000 -2.480654000000 0.148983000000  
 F 3.743555000000 -1.499470000000 -1.897361000000  
 F 4.448199000000 0.569603000000 -0.433217000000  
 F 3.180337000000 -0.492329000000 1.594973000000  
 F 5.218389000000 -2.000312000000 0.430184000000  
 Sb 0.241770000000 3.170720000000 0.341124000000  
 F 1.440761000000 2.132351000000 1.337280000000  
 F -0.948828000000 2.997917000000 1.752369000000  
 F 0.944919000000 4.824568000000 0.743244000000  
 F -1.145659000000 3.697506000000 -0.761774000000  
 F 1.258297000000 2.760389000000 -1.158043000000  
 Sb -3.850678000000 -0.757251000000 -0.069744000000  
 F -3.446378000000 -2.566596000000 0.164205000000  
 F -2.647606000000 -0.424758000000 1.326286000000  
 F -3.750113000000 1.032446000000 -0.525847000000  
 F -4.586749000000 -1.160163000000 -1.717455000000  
 F -5.395879000000 -0.723921000000 0.934120000000  
 N -0.096836000000 -1.455024000000 0.802477000000  
 C -0.580708000000 -2.710686000000 0.859496000000  
 H -0.903634000000 -3.159706000000 -0.068886000000  
 C -0.659277000000 -3.371314000000 2.061245000000  
 H -1.062510000000 -4.372594000000 2.084912000000  
 C -0.220179000000 -2.730214000000 3.211212000000  
 H -0.271694000000 -3.234977000000 4.166924000000  
 C 0.285244000000 -1.442678000000 3.130698000000  
 H 0.644407000000 -0.913524000000 4.000659000000  
 C 0.332661000000 -0.816305000000 1.906276000000  
 H 0.722338000000 0.186346000000 1.790899000000

**SbF<sub>3</sub>**

Sb 0.000000000000 0.000000000000 0.347127000000  
 F 0.000000000000 1.591675000000 -0.655684000000  
 F 1.378431000000 -0.795837000000 -0.655684000000  
 F -1.378431000000 -0.795837000000 -0.655684000000

**SbF<sub>3</sub>·AN**

Sb 0.752779000000 0.325811000000 -0.016037000000  
 F 2.241677000000 -0.842718000000 0.016796000000  
 F -0.132669000000 -0.724222000000 -1.320014000000  
 F -0.098446000000 -0.593858000000 1.404904000000  
 N -1.989718000000 1.430410000000 -0.041900000000  
 C -2.482227000000 0.394596000000 -0.012906000000  
 C -3.032543000000 -0.949694000000 0.026889000000  
 H -2.502086000000 -1.511568000000 0.795092000000  
 H -2.872454000000 -1.425054000000 -0.939200000000  
 H -4.095601000000 -0.914843000000 0.256245000000

**SbF<sub>3</sub>·Py**

Sb -1.290177000000 -0.342147000000 -0.011330000000  
 F -3.120224000000 0.213575000000 0.026355000000  
 F -0.939667000000 0.943611000000 -1.361475000000  
 F -0.908548000000 0.838202000000 1.423062000000  
 N 1.249406000000 -0.163993000000 -0.026278000000  
 C 2.044096000000 -1.229889000000 -0.027394000000  
 H 1.551981000000 -2.196920000000 -0.044839000000  
 C 3.424996000000 -1.128874000000 -0.006898000000  
 H 4.035228000000 -2.020852000000 -0.008169000000  
 C 3.990650000000 0.136566000000 0.015786000000  
 H 5.066253000000 0.255545000000 0.033034000000  
 C 3.160684000000 1.247329000000 0.016627000000  
 H 3.563336000000 2.250114000000 0.034080000000  
 C 1.789729000000 1.053173000000 -0.004686000000  
 H 1.091433000000 1.881237000000 -0.004411000000

**Sb<sub>2</sub>F<sub>6</sub>**

Sb 1.801545000000 -0.001733000000 -0.356054000000  
 F -0.627958000000 -1.142065000000 -0.440423000000  
 Sb -1.904858000000 0.053161000000 0.358052000000  
 F 0.557453000000 0.686922000000 0.951707000000  
 F -3.257420000000 -0.581920000000 -0.795834000000  
 F -1.409660000000 1.419151000000 -0.845648000000  
 F 3.221498000000 0.903408000000 0.497217000000  
 F 2.101530000000 -1.576916000000 0.621655000000

**Sb<sub>2</sub>F<sub>6</sub>·AN**

F -1.709959000000 -2.211441000000 0.067500000000  
 Sb -1.872163000000 -0.354780000000 -0.321556000000  
 F 3.396675000000 -0.650604000000 -0.833519000000  
 Sb 1.889265000000 -0.618933000000 0.317317000000  
 F 0.723540000000 -0.731826000000 -1.200157000000  
 F 1.891171000000 1.278498000000 0.302404000000  
 F -0.456690000000 -0.074589000000 0.985866000000  
 F -3.176192000000 -0.097262000000 1.018604000000  
 N -1.373037000000 2.324796000000 -0.141831000000  
 C -0.521576000000 3.089368000000 -0.132447000000  
 C 0.560785000000 4.058654000000 -0.119734000000  
 H 0.476801000000 4.711249000000 -0.986664000000  
 H 0.504610000000 4.653234000000 0.790150000000  
 H 1.505494000000 3.518154000000 -0.147626000000

**Sb<sub>2</sub>F<sub>6</sub>·Py**

|    |                 |                 |                 |
|----|-----------------|-----------------|-----------------|
| Sb | -2.756973000000 | 0.384793000000  | -0.374957000000 |
| F  | -3.868671000000 | 1.772986000000  | 0.298879000000  |
| F  | -3.688843000000 | -0.919158000000 | 0.614377000000  |
| F  | -1.499008000000 | 0.724556000000  | 1.040630000000  |
| F  | -1.012213000000 | -1.460183000000 | -0.315484000000 |
| F  | 0.451179000000  | 0.611241000000  | -0.876403000000 |
| Sb | 0.702149000000  | -0.788268000000 | 0.396466000000  |
| F  | 1.549200000000  | -2.019591000000 | -0.782715000000 |
| N  | 2.964299000000  | 0.194144000000  | 0.113347000000  |
| C  | 3.114814000000  | 1.516017000000  | 0.190644000000  |
| H  | 2.210083000000  | 2.093985000000  | 0.339000000000  |
| H  | 4.430879000000  | 3.201603000000  | 0.133021000000  |
| C  | 4.350570000000  | 2.125962000000  | 0.067546000000  |
| C  | 5.464476000000  | 1.328298000000  | -0.146401000000 |
| H  | 6.445568000000  | 1.773363000000  | -0.249123000000 |
| C  | 4.031160000000  | -0.574794000000 | -0.100198000000 |
| H  | 3.842291000000  | -1.637963000000 | -0.182606000000 |
| C  | 5.303617000000  | -0.045496000000 | -0.234079000000 |
| H  | 6.144447000000  | -0.701373000000 | -0.409283000000 |

**Sb<sub>4</sub>F<sub>12</sub> (isom1)**

|    |                 |                 |                 |
|----|-----------------|-----------------|-----------------|
| Sb | 0.040321000000  | 2.404813000000  | 0.021570000000  |
| F  | 2.844629000000  | 1.392380000000  | -0.699506000000 |
| Sb | 3.364802000000  | -0.435397000000 | -0.602184000000 |
| F  | -1.145364000000 | -2.384312000000 | -0.458187000000 |
| Sb | 0.107719000000  | -1.639476000000 | 0.789974000000  |
| F  | -2.021769000000 | -0.416344000000 | 0.895739000000  |
| Sb | -3.209464000000 | -0.461181000000 | -0.645669000000 |
| F  | -1.603785000000 | 1.691880000000  | -0.685053000000 |
| F  | 0.466550000000  | -0.255161000000 | -0.541740000000 |
| F  | 1.487788000000  | -2.623299000000 | -0.133421000000 |
| F  | 2.553344000000  | -0.573296000000 | 1.128711000000  |
| F  | 5.027792000000  | -0.018511000000 | 0.178563000000  |
| F  | -4.360724000000 | 0.808221000000  | 0.130515000000  |
| F  | -4.151277000000 | -1.897303000000 | 0.138987000000  |
| F  | -0.884650000000 | 3.746528000000  | 0.970647000000  |
| F  | 0.068321000000  | 1.272912000000  | 1.547162000000  |

**Sb<sub>4</sub>F<sub>12</sub> (isom2)**

|    |                 |                 |                 |
|----|-----------------|-----------------|-----------------|
| Sb | 0.077328000000  | 2.007618000000  | -1.472505000000 |
| F  | 1.843641000000  | 0.214042000000  | -0.805776000000 |
| Sb | 2.604908000000  | -0.951230000000 | 0.521957000000  |
| F  | 0.257869000000  | -0.030444000000 | 1.569045000000  |
| Sb | -1.378461000000 | 0.678092000000  | 2.270288000000  |
| F  | -2.128262000000 | -1.005340000000 | 0.505338000000  |
| Sb | -1.637416000000 | -1.984564000000 | -1.091785000000 |
| F  | -0.804305000000 | 0.261492000000  | -1.440477000000 |
| F  | -1.581197000000 | 1.794612000000  | 0.740004000000  |
| F  | -0.431710000000 | 2.045777000000  | 3.165968000000  |
| C  | 3.176003000000  | 0.530879000000  | 1.540047000000  |
| F  | 4.214253000000  | -1.020932000000 | -0.469994000000 |
| F  | -2.062910000000 | -3.580631000000 | -0.157806000000 |
| F  | 0.176367000000  | -2.156048000000 | -0.552496000000 |
| F  | 0.743810000000  | 1.622265000000  | -3.193914000000 |
| F  | -1.512927000000 | 2.741471000000  | -2.191689000000 |

**Sb<sub>4</sub>F<sub>12</sub>·AN**

|    |                 |                 |                 |
|----|-----------------|-----------------|-----------------|
| Sb | -0.715182000000 | 2.494696000000  | -0.136813000000 |
| F  | 2.091562000000  | 2.255555000000  | -0.088911000000 |
| Sb | 3.195201000000  | 0.711971000000  | -0.477364000000 |
| F  | -1.085132000000 | -2.293338000000 | -0.623545000000 |
| Sb | 0.145436000000  | -1.447422000000 | 0.599812000000  |
| F  | -2.218684000000 | -0.641745000000 | 0.942371000000  |
| Sb | -3.490605000000 | -0.904658000000 | -0.494914000000 |
| F  | -2.260575000000 | 1.461250000000  | -0.670576000000 |
| F  | 0.300426000000  | -0.030307000000 | -0.724873000000 |
| F  | 1.550374000000  | -2.386250000000 | -0.328409000000 |
| F  | 2.343709000000  | -0.162890000000 | 1.013137000000  |
| F  | 4.565481000000  | 1.416378000000  | 0.596735000000  |
| F  | -4.804827000000 | 0.083244000000  | 0.426803000000  |
| F  | -4.050110000000 | -2.528062000000 | 0.300901000000  |
| F  | -1.765510000000 | 3.650490000000  | 0.924450000000  |
| F  | -0.357734000000 | 1.390536000000  | 1.364465000000  |
| N  | 4.563283000000  | -1.485136000000 | -0.168087000000 |
| C  | 4.385968000000  | -2.614097000000 | -0.113701000000 |
| C  | 4.142243000000  | -4.043326000000 | -0.045879000000 |
| H  | 4.850590000000  | -4.568578000000 | -0.683630000000 |
| H  | 4.255775000000  | -4.382845000000 | 0.982070000000  |
| H  | 3.123199000000  | -4.225762000000 | -0.384052000000 |

**Sb<sub>4</sub>F<sub>12</sub>·Py**

|    |                 |                 |                 |
|----|-----------------|-----------------|-----------------|
| Sb | -1.447181000000 | -2.426593000000 | 0.000549000000  |
| F  | 1.330176000000  | -2.491617000000 | 0.467183000000  |
| Sb | 2.634432000000  | -1.062552000000 | 0.748842000000  |
| F  | -1.073987000000 | 2.450871000000  | 0.671707000000  |
| Sb | 0.009800000000  | 1.370523000000  | -0.497938000000 |
| F  | -2.383302000000 | 0.982453000000  | -0.972422000000 |
| Sb | -3.676078000000 | 1.288075000000  | 0.443125000000  |
| F  | -2.935076000000 | -1.246971000000 | 0.402996000000  |
| F  | -0.331085000000 | -0.092209000000 | 0.731984000000  |
| F  | 1.515117000000  | 1.780054000000  | 0.649208000000  |
| F  | 1.895940000000  | -0.344767000000 | -0.889270000000 |
| F  | 3.896305000000  | -2.156026000000 | -0.152509000000 |
| F  | -5.073272000000 | 0.583841000000  | -0.603040000000 |
| F  | -3.984308000000 | 3.032548000000  | -0.222527000000 |
| F  | -2.516035000000 | -3.479996000000 | -1.154721000000 |
| F  | -0.868989000000 | -1.370693000000 | -1.466884000000 |
| N  | 4.327364000000  | 0.560564000000  | 0.073556000000  |
| C  | 4.460096000000  | 1.683863000000  | 0.777735000000  |
| H  | 3.789316000000  | 1.806531000000  | 1.619932000000  |
| C  | 5.386959000000  | 2.655643000000  | 0.444361000000  |
| H  | 5.465869000000  | 3.553043000000  | 1.040980000000  |
| C  | 6.192685000000  | 2.448498000000  | -0.664320000000 |
| H  | 6.926015000000  | 3.189737000000  | -0.954376000000 |
| C  | 6.046212000000  | 1.281177000000  | -1.398392000000 |
| H  | 6.653503000000  | 1.083893000000  | -2.270177000000 |
| C  | 5.099962000000  | 0.355993000000  | -0.994406000000 |
| H  | 4.945292000000  | -0.577650000000 | -1.519951000000 |

**2<sub>6</sub>**

|    |             |             |              |
|----|-------------|-------------|--------------|
| Sb | 4.704412000 | 1.440288000 | -1.698862000 |
| F  | 4.098388000 | 3.133566000 | -1.121233000 |
| F  | 6.490977000 | 1.923056000 | -1.402740000 |
| F  | 4.621125000 | 0.817486000 | 0.094377000  |
| N  | 2.694835000 | 0.865182000 | -1.935874000 |

**4<sub>4</sub>**

|    |              |              |              |
|----|--------------|--------------|--------------|
| Sb | -0.609761000 | 0.241129000  | -0.310746000 |
| F  | 0.681993000  | -0.587786000 | -1.505301000 |
| F  | -1.783876000 | -1.327689000 | -1.129140000 |
| F  | -1.501560000 | 1.069522000  | -1.856717000 |
| F  | 0.543651000  | 1.932614000  | -0.593647000 |

|    |              |              |              |    |              |              |              |
|----|--------------|--------------|--------------|----|--------------|--------------|--------------|
| C  | 1.793518000  | 1.776088000  | -2.336199000 | Sb | 1.509751000  | -1.730952000 | 2.410515000  |
| H  | 2.170731000  | 2.761622000  | -2.570360000 | F  | 0.339743000  | -0.460533000 | 3.258826000  |
| C  | 0.455158000  | 1.461162000  | -2.411636000 | F  | 2.954340000  | -0.644437000 | 3.196366000  |
| H  | -0.251514000 | 2.221820000  | -2.710073000 | F  | 1.778772000  | -0.522214000 | 0.916945000  |
| C  | 0.046172000  | 0.179504000  | -2.071617000 | F  | -0.274846000 | -2.036524000 | 1.258308000  |
| H  | -1.000566000 | -0.087756000 | -2.110837000 | Sb | 3.150619000  | -2.006547000 | -1.687539000 |
| C  | 2.313367000  | -0.380939000 | -1.604105000 | F  | 4.626226000  | -2.713361000 | -2.633180000 |
| H  | 3.087757000  | -1.066822000 | -1.291589000 | F  | 4.108325000  | -0.166855000 | -1.570553000 |
| C  | 0.990826000  | -0.756823000 | -1.668678000 | F  | 2.516473000  | -1.117253000 | -3.304449000 |
| H  | 0.714368000  | -1.769796000 | -1.408395000 | F  | 1.940427000  | -3.439345000 | -2.507487000 |
| F  | 5.213230000  | -0.297585000 | -2.216741000 | Sb | -4.227198000 | 2.403353000  | 1.111078000  |
| F  | 4.714020000  | 2.050539000  | -3.467255000 | F  | -4.343049000 | 4.109086000  | 0.263384000  |
| Sb | -2.342789000 | -3.271512000 | -1.979074000 | F  | -4.429227000 | 1.714101000  | -0.852561000 |
| F  | -1.955657000 | -1.803488000 | -0.849895000 | F  | -2.365629000 | 2.210342000  | 0.576159000  |
| F  | -0.540568000 | -3.755066000 | -2.024514000 | F  | -3.265333000 | 3.386775000  | 2.596169000  |
| F  | -2.671045000 | -4.348086000 | -0.471464000 | Sb | 2.992733000  | 1.893123000  | -1.898541000 |
| N  | -4.379314000 | -2.663523000 | -1.863547000 | F  | 3.487859000  | 1.894733000  | -0.046917000 |
| C  | -4.687678000 | -1.360729000 | -1.829167000 | F  | 2.422052000  | 3.762792000  | -1.643764000 |
| H  | -3.865699000 | -0.658065000 | -1.881805000 | F  | 4.693829000  | 2.514580000  | -2.437328000 |
| C  | -5.997802000 | -0.945317000 | -1.696634000 | Sb | -2.243376000 | -1.761164000 | 2.887243000  |
| H  | -6.205312000 | 0.113818000  | -1.645906000 | F  | -0.889314000 | -2.850578000 | 3.690412000  |
| C  | -6.991968000 | -1.902337000 | -1.594177000 | F  | -2.862791000 | -3.188421000 | 1.785954000  |
| H  | -8.024857000 | -1.601963000 | -1.475521000 | F  | -3.449916000 | -2.273667000 | 4.267928000  |
| C  | -5.333794000 | -3.601598000 | -1.759789000 | Sb | -4.240755000 | -0.635343000 | -1.317205000 |
| H  | -5.000386000 | -4.629976000 | -1.778431000 | F  | -3.614192000 | -0.368350000 | 0.498058000  |
| C  | -6.656767000 | -3.249760000 | -1.628638000 | F  | -6.032660000 | -0.609771000 | -0.682901000 |
| H  | -7.406316000 | -4.022065000 | -1.538410000 | F  | -4.193913000 | -2.557988000 | -1.009534000 |
| F  | -2.899078000 | -4.669907000 | -3.095780000 | Sb | 5.021855000  | 0.324964000  | 1.577124000  |
| F  | -2.153053000 | -2.102633000 | -3.438040000 | F  | 6.137629000  | -0.221349000 | 3.018271000  |
| Sb | -3.495707000 | 2.916725000  | -1.554520000 | F  | 6.398343000  | 1.387500000  | 0.825640000  |
| F  | -1.779919000 | 3.647532000  | -1.817456000 | F  | 4.372002000  | 1.803360000  | 2.585989000  |
| F  | -3.582654000 | 2.271369000  | -3.300928000 | N  | -1.781002000 | -3.942825000 | -0.566355000 |
| F  | -2.700368000 | 1.310698000  | -0.958923000 | H  | -2.178338000 | -2.999477000 | -0.487973000 |
| N  | -3.364966000 | 3.619622000  | 0.454946000  | C  | -2.552329000 | -4.993899000 | -0.284047000 |
| C  | -2.764991000 | 4.792425000  | 0.699847000  | H  | -3.561877000 | -4.762590000 | 0.021795000  |
| H  | -2.433340000 | 5.354327000  | -0.162832000 | C  | -2.021112000 | -6.261278000 | -0.387331000 |
| C  | -2.571775000 | 5.232375000  | 1.991154000  | H  | -2.635065000 | -7.118066000 | -0.152589000 |
| H  | -2.068016000 | 6.171924000  | 2.161413000  | C  | -0.696165000 | -6.403919000 | -0.783009000 |
| C  | -3.002646000 | 4.435419000  | 3.041590000  | H  | -0.262860000 | -7.392463000 | -0.867212000 |
| H  | -2.847558000 | 4.753877000  | 4.064309000  | C  | 0.073381000  | -5.285037000 | -1.069348000 |
| C  | -3.794686000 | 2.842851000  | 1.459048000  | H  | 1.101661000  | -5.346095000 | -1.394691000 |
| H  | -4.270839000 | 1.909861000  | 1.183922000  | C  | -0.506199000 | -4.038803000 | -0.941679000 |
| C  | -3.625679000 | 3.226626000  | 2.774056000  | H  | 0.006999000  | -3.107214000 | -1.133487000 |
| H  | -3.972263000 | 2.567280000  | 3.556379000  | N  | -0.831843000 | 4.003308000  | -1.674640000 |
| F  | -5.187184000 | 2.218508000  | -1.117392000 | H  | -0.307041000 | 3.156685000  | -1.375878000 |
| F  | -4.242046000 | 4.581512000  | -1.986002000 | C  | -0.141896000 | 5.138501000  | -1.864580000 |
| Sb | -4.646054000 | -1.265444000 | 2.218529000  | H  | 0.931944000  | 5.053736000  | -1.751647000 |
| F  | -4.897297000 | -2.736233000 | 1.068356000  | C  | -0.816766000 | 6.291345000  | -2.196254000 |
| F  | -6.480471000 | -1.004493000 | 2.404392000  | H  | -0.262406000 | 7.204630000  | -2.355174000 |
| F  | -4.579927000 | -0.104124000 | 0.727448000  | C  | -2.202320000 | 6.251788000  | -2.317082000 |
| N  | -2.559645000 | -1.540700000 | 1.962041000  | H  | -2.749285000 | 7.152271000  | -2.565163000 |
| C  | -2.051520000 | -2.781838000 | 2.005503000  | C  | -2.880674000 | 5.061966000  | -2.115194000 |
| H  | -2.754985000 | -3.585250000 | 2.173991000  | H  | -3.956643000 | 4.995807000  | -2.171170000 |
| C  | -0.702538000 | -3.004062000 | 1.827563000  | C  | -2.161610000 | 3.927440000  | -1.793269000 |
| H  | -0.311525000 | -4.010370000 | 1.857780000  | H  | -2.607663000 | 2.958667000  | -1.619193000 |
| C  | 0.126909000  | -1.916346000 | 1.603297000  | N  | -0.603141000 | 3.459901000  | 2.296477000  |
| H  | 1.190664000  | -2.061371000 | 1.466128000  | H  | -1.627894000 | 3.446853000  | 2.450600000  |
| C  | -1.770085000 | -0.483301000 | 1.718560000  | C  | -0.076813000 | 4.467315000  | 1.592283000  |
| H  | -2.248009000 | 0.485026000  | 1.656553000  | H  | -0.774286000 | 5.223239000  | 1.256855000  |
| C  | -0.414554000 | -0.640266000 | 1.542374000  | C  | 1.275018000  | 4.493381000  | 1.341667000  |
| H  | 0.200654000  | 0.223293000  | 1.341176000  | H  | 1.705609000  | 5.300559000  | 0.766950000  |
| F  | -4.237110000 | 0.242357000  | 3.284489000  | C  | 2.072362000  | 3.466282000  | 1.835166000  |
| F  | -4.538139000 | -2.408168000 | 3.698308000  | H  | 3.138520000  | 3.458296000  | 1.662265000  |
| Sb | 3.742405000  | -3.997634000 | 1.279767000  | C  | 1.493715000  | 2.422014000  | 2.545140000  |



|                       |              |              |              |                      |              |              |              |
|-----------------------|--------------|--------------|--------------|----------------------|--------------|--------------|--------------|
| F                     | 3.992591000  | -5.445388000 | 0.117779000  | H                    | 2.092900000  | 1.606462000  | 2.926953000  |
| F                     | 2.063752000  | -4.569943000 | 1.857758000  | C                    | 0.132561000  | 2.442404000  | 2.757554000  |
| F                     | 2.983868000  | -2.969219000 | -0.112625000 | H                    | -0.392995000 | 1.660706000  | 3.286290000  |
| N                     | 5.645670000  | -3.283790000 | 0.596444000  | N                    | 0.059589000  | -1.939910000 | -3.933810000 |
| C                     | 6.650550000  | -4.153624000 | 0.417531000  | H                    | 1.064899000  | -1.830055000 | -3.705168000 |
| H                     | 6.434470000  | -5.189707000 | 0.640291000  | C                    | -0.445310000 | -3.167466000 | -4.086668000 |
| C                     | 7.881503000  | -3.726727000 | -0.029761000 | H                    | 0.264355000  | -3.974960000 | -3.976514000 |
| H                     | 8.674886000  | -4.446360000 | -0.168909000 | C                    | -1.791398000 | -3.318085000 | -4.335901000 |
| C                     | 8.067613000  | -2.376410000 | -0.297619000 | H                    | -2.207563000 | -4.307707000 | -4.455209000 |
| H                     | 9.023792000  | -2.019900000 | -0.658033000 | C                    | -2.589339000 | -2.182514000 | -4.416644000 |
| C                     | 5.811692000  | -1.979652000 | 0.344746000  | H                    | -3.651993000 | -2.283985000 | -4.598497000 |
| H                     | 4.961762000  | -1.333733000 | 0.516870000  | C                    | -2.029744000 | -0.926008000 | -4.249661000 |
| C                     | 7.020896000  | -1.489943000 | -0.107952000 | H                    | -2.625338000 | -0.025784000 | -4.271783000 |
| H                     | 7.117438000  | -0.434045000 | -0.318797000 | C                    | -0.677964000 | -0.831955000 | -3.996310000 |
| F                     | 3.662964000  | -2.453280000 | 2.352194000  | H                    | -0.160719000 | 0.096064000  | -3.803747000 |
| F                     | 4.688027000  | -4.918471000 | 2.609903000  |                      |              |              |              |
| Sb                    | 1.039882000  | 3.363589000  | 1.237092000  | <b>3</b>             |              |              |              |
| F                     | 1.719960000  | 1.701492000  | 0.657916000  | Sb                   | 0.701035000  | 0.588378000  | -0.459989000 |
| F                     | -0.717959000 | 2.727578000  | 1.130684000  | Sb                   | -2.882821000 | -0.248177000 | 0.402369000  |
| F                     | 1.042922000  | 4.005899000  | -0.526328000 | F                    | 1.523498000  | 2.116811000  | 0.317139000  |
| N                     | 3.063163000  | 4.009976000  | 1.364739000  | F                    | 0.609534000  | -0.324922000 | 1.201589000  |
| C                     | 3.993232000  | 3.160951000  | 1.819496000  | F                    | -1.034280000 | 1.393101000  | 0.075957000  |
| H                     | 3.642605000  | 2.205221000  | 2.183522000  | F                    | -1.439507000 | -1.103227000 | -0.539243000 |
| C                     | 5.330838000  | 3.494765000  | 1.786748000  | F                    | -3.488326000 | 0.662364000  | -1.131393000 |
| H                     | 6.061856000  | 2.782960000  | 2.140607000  | F                    | -3.989620000 | -1.744744000 | 0.009315000  |
| C                     | 5.700768000  | 4.726124000  | 1.272233000  | N                    | 3.027522000  | -0.183290000 | -0.133713000 |
| H                     | 6.745649000  | 5.003039000  | 1.221295000  | C                    | 3.632042000  | -0.957873000 | -1.031058000 |
| C                     | 3.406188000  | 5.204618000  | 0.863686000  | H                    | 3.056947000  | -1.209902000 | -1.915922000 |
| H                     | 2.596702000  | 5.822660000  | 0.499617000  | C                    | 4.923511000  | -1.423606000 | -0.856455000 |
| C                     | 4.724489000  | 5.597322000  | 0.810907000  | H                    | 5.380088000  | -2.051461000 | -1.608126000 |
| H                     | 4.976729000  | 6.562560000  | 0.397278000  | C                    | 5.601821000  | -1.063656000 | 0.297799000  |
| F                     | 0.508799000  | 5.076365000  | 1.812578000  | H                    | 6.613438000  | -1.408525000 | 0.467884000  |
| F                     | 1.202948000  | 2.784850000  | 3.013776000  | C                    | 4.968589000  | -0.257330000 | 1.231434000  |
|                       |              |              |              | H                    | 5.464668000  | 0.043986000  | 2.142982000  |
|                       |              |              |              | C                    | 3.674617000  | 0.163659000  | 0.978530000  |
|                       |              |              |              | H                    | 3.128116000  | 0.797035000  | 1.666026000  |
| <b>3<sub>2a</sub></b> |              |              |              | <b>3<sub>4</sub></b> |              |              |              |
| Sb                    | -4.283061000 | -1.279943000 | -1.409322000 | Sb                   | 1.115589000  | -1.627657000 | 0.540340000  |
| Sb                    | -2.048627000 | -3.932457000 | -0.239712000 | Sb                   | -1.323886000 | -0.856176000 | 3.315352000  |
| F                     | -6.097025000 | -1.872651000 | -1.553395000 | F                    | 2.700427000  | -0.559541000 | 0.888295000  |
| F                     | -4.038001000 | -1.824011000 | 0.401378000  | F                    | 1.227472000  | -2.302633000 | 2.342654000  |
| F                     | -3.801179000 | -3.229852000 | -1.692473000 | F                    | 0.100407000  | -0.143043000 | 1.615381000  |
| F                     | -1.597319000 | -2.188737000 | -0.907410000 | F                    | -1.584491000 | -2.090525000 | 1.864954000  |
| F                     | -1.466809000 | -4.768820000 | -1.843342000 | F                    | -2.225869000 | 0.635554000  | 2.501854000  |
| F                     | -0.176478000 | -4.034849000 | 0.346545000  | F                    | -3.034777000 | -1.396499000 | 3.982871000  |
| N                     | -5.511451000 | 0.378830000  | -0.130840000 | N                    | 2.823263000  | -3.310721000 | 0.315905000  |
| C                     | -6.684756000 | 0.823816000  | -0.582851000 | C                    | 2.689701000  | -4.222755000 | -0.644034000 |
| H                     | -7.020081000 | 0.416112000  | -1.529162000 | H                    | 1.818589000  | -4.126318000 | -1.283550000 |
| C                     | -7.451629000 | 1.730050000  | 0.126245000  | C                    | 3.599330000  | -5.256060000 | -0.799042000 |
| H                     | -8.400476000 | 2.062107000  | -0.271458000 | H                    | 3.458898000  | -5.984573000 | -1.584847000 |
| C                     | -6.981629000 | 2.179880000  | 1.351958000  | C                    | 4.664356000  | -5.337457000 | 0.083045000  |
| H                     | -7.560527000 | 2.884919000  | 1.935398000  | H                    | 5.387118000  | -6.138752000 | -0.005576000 |
| C                     | -5.769924000 | 1.703980000  | 1.824472000  | C                    | 4.793426000  | -4.384904000 | 1.083890000  |
| H                     | -5.371055000 | 2.011335000  | 2.781211000  | H                    | 5.611102000  | -4.416701000 | 1.789990000  |
| C                     | -5.059258000 | 0.797971000  | 1.052978000  | C                    | 3.847843000  | -3.379424000 | 1.165718000  |
| H                     | -4.114148000 | 0.390904000  | 1.385562000  | H                    | 3.887359000  | -2.604583000 | 1.922582000  |
| Sb                    | -1.094789000 | 1.858693000  | -0.034476000 | Sb                   | -4.283061000 | -1.279943000 | -1.409322000 |
| Sb                    | 1.005455000  | 0.652219000  | -3.100921000 | Sb                   | -2.048627000 | -3.932457000 | -0.239712000 |
| F                     | -2.534741000 | 0.584098000  | -0.356582000 | F                    | -6.097025000 | -1.872651000 | -1.553395000 |
| F                     | -1.271859000 | 2.336426000  | -1.893011000 | F                    | -4.038001000 | -1.824011000 | 0.401378000  |
| F                     | 0.104186000  | 0.455699000  | -0.930032000 | F                    | -3.801179000 | -3.229852000 | -1.692473000 |
| F                     | 1.643240000  | 2.190176000  | -2.158419000 | F                    | -1.466809000 | -4.768820000 | -1.843342000 |
| F                     | 2.083768000  | -0.654888000 | -2.185617000 | F                    | -0.176478000 | -4.034849000 | 0.346545000  |
| F                     | 2.452296000  | 0.877994000  | -4.330682000 | F                    | -5.511451000 | 0.378830000  | -0.130840000 |
| N                     | -3.026083000 | 3.339313000  | -0.028080000 | F                    | -6.684756000 | 0.823816000  | -0.582851000 |
|                       |              |              |              | F                    | -7.020081000 | 0.416112000  | -1.529162000 |
|                       |              |              |              | F                    | -7.451629000 | 1.730050000  | 0.126245000  |
|                       |              |              |              | F                    | -8.400476000 | 2.062107000  | -0.271458000 |
|                       |              |              |              | F                    | -6.981629000 | 2.179880000  | 1.351958000  |
|                       |              |              |              | F                    | -7.560527000 | 2.884919000  | 1.935398000  |
|                       |              |              |              | F                    | -5.769924000 | 1.703980000  | 1.824472000  |
|                       |              |              |              | F                    | -5.371055000 | 2.011335000  | 2.781211000  |
|                       |              |              |              | F                    | -5.059258000 | 0.797971000  | 1.052978000  |
|                       |              |              |              | F                    | -4.114148000 | 0.390904000  | 1.385562000  |
|                       |              |              |              | F                    | -1.094789000 | 1.858693000  | -0.034476000 |
|                       |              |              |              | F                    | 1.005455000  | 0.652219000  | -3.100921000 |
|                       |              |              |              | F                    | -2.534741000 | 0.584098000  | -0.356582000 |
|                       |              |              |              | F                    | -1.271859000 | 2.336426000  | -1.893011000 |
|                       |              |              |              | F                    | 0.104186000  | 0.455699000  | -0.930032000 |
|                       |              |              |              | F                    | 1.643240000  | 2.190176000  | -2.158419000 |
|                       |              |              |              | F                    | 2.083768000  | -0.654888000 | -2.185617000 |
|                       |              |              |              | F                    | 2.452296000  | 0.877994000  | -4.330682000 |
|                       |              |              |              | N                    | -3.026083000 | 3.339313000  | -0.028080000 |

|                       |              |              |              |    |              |              |              |
|-----------------------|--------------|--------------|--------------|----|--------------|--------------|--------------|
| C                     | -3.147226000 | 4.279652000  | 0.904351000  | F  | -1.466809000 | -4.768820000 | -1.843342000 |
| H                     | -2.342917000 | 4.344702000  | 1.629840000  | F  | -0.176478000 | -4.034849000 | 0.346545000  |
| C                     | -4.232851000 | 5.139606000  | 0.942136000  | N  | -5.511451000 | 0.378830000  | -0.130840000 |
| H                     | -4.297322000 | 5.896956000  | 1.710505000  | C  | -6.684756000 | 0.823816000  | -0.582851000 |
| C                     | -5.213309000 | 5.006799000  | -0.027905000 | H  | -7.020081000 | 0.416112000  | -1.529162000 |
| H                     | -6.073415000 | 5.664286000  | -0.029925000 | C  | -7.451629000 | 1.730050000  | 0.126245000  |
| C                     | -5.079709000 | 4.024905000  | -0.998954000 | H  | -8.400476000 | 2.062107000  | -0.271458000 |
| H                     | -5.823030000 | 3.893359000  | -1.772491000 | C  | -6.981629000 | 2.179880000  | 1.351958000  |
| C                     | -3.964767000 | 3.207904000  | -0.964822000 | H  | -7.560527000 | 2.884919000  | 1.935398000  |
| H                     | -3.794320000 | 2.427290000  | -1.696470000 | C  | -5.769924000 | 1.703980000  | 1.824472000  |
| <b>3<sub>2b</sub></b> |              |              |              | H  | -5.371055000 | 2.011335000  | 2.781211000  |
| Sb                    | -1.437483000 | -1.018366000 | 0.107078000  | C  | -5.059258000 | 0.797971000  | 1.052978000  |
| Sb                    | 1.726934000  | -3.071339000 | -0.291536000 | H  | -4.114148000 | 0.390904000  | 1.385562000  |
| F                     | -2.181787000 | -0.792554000 | -1.613731000 | Sb | -1.094789000 | 1.858693000  | -0.034476000 |
| F                     | -1.393513000 | -2.938609000 | -0.117403000 | Sb | 1.005455000  | 0.652219000  | -3.100921000 |
| F                     | 0.352012000  | -1.210645000 | -0.944371000 | F  | -2.534741000 | 0.584098000  | -0.356582000 |
| F                     | 0.976087000  | -2.429802000 | 1.327923000  | F  | -1.271859000 | 2.336426000  | -1.893011000 |
| F                     | 2.899463000  | -1.555367000 | -0.516703000 | F  | 0.104186000  | 0.455699000  | -0.930032000 |
| F                     | 3.114828000  | -3.940692000 | 0.691822000  | F  | 1.643240000  | 2.190176000  | -2.158419000 |
| N                     | -3.749075000 | -1.552673000 | 0.506678000  | F  | 2.083768000  | -0.654888000 | -2.185617000 |
| C                     | -4.501250000 | -0.745395000 | 1.254283000  | F  | 2.452296000  | 0.877994000  | -4.330682000 |
| H                     | -3.999907000 | 0.106413000  | 1.697545000  | N  | -3.026083000 | 3.339313000  | -0.028080000 |
| C                     | -5.855427000 | -0.965895000 | 1.435630000  | C  | -3.147226000 | 4.279652000  | 0.904351000  |
| H                     | -6.434153000 | -0.286927000 | 2.045077000  | H  | -2.342917000 | 4.344702000  | 1.629840000  |
| C                     | -6.437898000 | -2.058366000 | 0.813557000  | C  | -4.232851000 | 5.139606000  | 0.942136000  |
| H                     | -7.495188000 | -2.256783000 | 0.932342000  | H  | -4.297322000 | 5.896956000  | 1.710505000  |
| C                     | -5.651148000 | -2.890967000 | 0.031719000  | C  | -5.213309000 | 5.006799000  | -0.027905000 |
| H                     | -6.069221000 | -3.749458000 | -0.474138000 | H  | -6.073415000 | 5.664286000  | -0.029925000 |
| C                     | -4.305004000 | -2.602919000 | -0.099775000 | C  | -5.079709000 | 4.024905000  | -0.998954000 |
| H                     | -3.638415000 | -3.212100000 | -0.696388000 | H  | -5.823030000 | 3.893359000  | -1.772491000 |
| Sb                    | 1.711479000  | 1.081299000  | -0.840100000 | C  | -3.964767000 | 3.207904000  | -0.964822000 |
| Sb                    | -1.677593000 | 3.185126000  | 0.092928000  | H  | -3.794320000 | 2.427290000  | -1.696470000 |
| F                     | 1.295267000  | 0.591975000  | 0.948739000  | Sb | 4.577800000  | 1.458043000  | 1.109167000  |
| F                     | 1.711899000  | 2.947988000  | -0.362457000 | Sb | 2.237431000  | 4.015886000  | -0.198462000 |
| F                     | -0.303008000 | 1.387148000  | -0.902493000 | F  | 6.392694000  | 1.987239000  | 0.820455000  |
| F                     | -2.209676000 | 3.286300000  | -1.708461000 | F  | 4.038521000  | 1.583102000  | -0.712740000 |
| F                     | -2.627322000 | 1.546448000  | 0.450296000  | F  | 4.163184000  | 3.444846000  | 1.032289000  |
| F                     | -3.233452000 | 4.151571000  | 0.638314000  | F  | 1.836858000  | 2.381381000  | 0.735606000  |
| N                     | 3.846758000  | 1.280187000  | 0.248108000  | F  | 1.960042000  | 5.086550000  | 1.344886000  |
| C                     | 4.897929000  | 0.574781000  | -0.165487000 | F  | 0.282126000  | 4.084503000  | -0.443479000 |
| H                     | 4.739219000  | -0.067124000 | -1.023097000 | N  | 5.553057000  | -0.515182000 | 0.086150000  |
| C                     | 6.121888000  | 0.637282000  | 0.476841000  | C  | 6.702146000  | -0.998993000 | 0.558580000  |
| H                     | 6.951420000  | 0.047498000  | 0.114506000  | H  | 7.132127000  | -0.476418000 | 1.405595000  |
| C                     | 6.245181000  | 1.456531000  | 1.587475000  | C  | 7.334810000  | -2.087033000 | -0.014326000 |
| H                     | 7.187226000  | 1.524313000  | 2.115929000  | H  | 8.269346000  | -2.445757000 | 0.393784000  |
| C                     | 5.145769000  | 2.184536000  | 2.017001000  | C  | 6.751919000  | -2.681536000 | -1.124363000 |
| H                     | 5.200476000  | 2.830939000  | 2.881145000  | H  | 7.224713000  | -3.530515000 | -1.602189000 |
| C                     | 3.958502000  | 2.069104000  | 1.317552000  | C  | 5.563302000  | -2.170697000 | -1.616845000 |
| H                     | 3.066128000  | 2.611928000  | 1.600691000  | H  | 5.077985000  | -2.596377000 | -2.484133000 |
|                       |              |              |              | C  | 4.988498000  | -1.080854000 | -0.982320000 |
|                       |              |              |              | H  | 4.065381000  | -0.639414000 | -1.334176000 |
